# Supplementary material for: Cross-sectional association between prolactin levels and non-alcoholic fatty liver disease in patients with type 2 diabetes mellitus: a retrospective analysis of patients from a single hospital in China
Source: PubMed Central journal article supplement — BMJ Open. 2022 Oct 3;12(10):e062252. doi: 10.1136/bmjopen-2022-062252 (PMC9535252; doi:10.1136/bmjopen-2022-062252), 2022-10-03
Supplement: bmjopen-2022-062252.draft_revisions.pdf [file bmjopen-2022-062252.draft_revisions.pdf]

# BMJ Open

BMJ Open is committed to open peer review. As part of this commitment we make the peer review history of every article we publish publicly available.

When an article is published we post the peer reviewers' comments and the authors' responses online. We also post the versions of the paper that were used during peer review. These are the versions that the peer review comments apply to.

The versions of the paper that follow are the versions that were submitted during the peer review process. They are not the versions of record or the final published versions. They should not be cited or distributed as the published version of this manuscript.

BMJ Open is an open access journal and the full, final, typeset and author-corrected version of record of the manuscript is available on our site with no access controls, subscription charges or pay-per-view fees (<http://bmjopen.bmj.com>).

If you have any questions on BMJ Open's open peer review process please email [info.bmjopen@bmj.com](mailto:info.bmjopen@bmj.com)

# BMJ Open

## Correlational study on the levels of prolactin and non-alcoholic fatty liver disease in type 2 diabetic patients

|                               |                                                                                                                                                                 |
|-------------------------------|-----------------------------------------------------------------------------------------------------------------------------------------------------------------|
| Journal:                      | <i>BMJ Open</i>                                                                                                                                                 |
| Manuscript ID                 | bmjopen-2022-062252                                                                                                                                             |
| Article Type:                 | Original research                                                                                                                                               |
| Date Submitted by the Author: | 23-Feb-2022                                                                                                                                                     |
| Complete List of Authors:     | Yuanyuan, Zhang; Anhui University of Traditional Chinese Medicine, Liu, Huaizhen; Anhui University of Traditional Chinese Medicine, Department of Endocrinology |
| Keywords:                     | DIABETES & ENDOCRINOLOGY, General diabetes < DIABETES & ENDOCRINOLOGY, General endocrinology < DIABETES & ENDOCRINOLOGY                                         |
|                               |                                                                                                                                                                 |

SCHOLARONE™  
Manuscripts

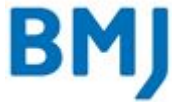

I, the Submitting Author has the right to grant and does grant on behalf of all authors of the Work (as defined in the below author licence), an exclusive licence and/or a non-exclusive licence for contributions from authors who are: i) UK Crown employees; ii) where BMJ has agreed a CC-BY licence shall apply, and/or iii) in accordance with the terms applicable for US Federal Government officers or employees acting as part of their official duties; on a worldwide, perpetual, irrevocable, royalty-free basis to BMJ Publishing Group Ltd ("BMJ") its licensees and where the relevant Journal is co-owned by BMJ to the co-owners of the Journal, to publish the Work in this journal and any other BMJ products and to exploit all rights, as set out in our [licence](#).

The Submitting Author accepts and understands that any supply made under these terms is made by BMJ to the Submitting Author unless you are acting as an employee on behalf of your employer or a postgraduate student of an affiliated institution which is paying any applicable article publishing charge ("APC") for Open Access articles. Where the Submitting Author wishes to make the Work available on an Open Access basis (and intends to pay the relevant APC), the terms of reuse of such Open Access shall be governed by a Creative Commons licence – details of these licences and which [Creative Commons](#) licence will apply to this Work are set out in our licence referred to above.

Other than as permitted in any relevant BMJ Author's Self Archiving Policies, I confirm this Work has not been accepted for publication elsewhere, is not being considered for publication elsewhere and does not duplicate material already published. I confirm all authors consent to publication of this Work and authorise the granting of this licence.

Running title: prolactin and fatty liver disease

1 Correlational study on the levels of prolactin and non-alcoholic fatty liver disease in  
2 type 2 diabetic patients

3 Yuanyuan Zhang<sup>a</sup>, Huaizhen Liu<sup>a\*</sup>

4 <sup>a</sup>Department of Endocrinology, Geriatrics Center, The First Affiliated Hospital of Anhui Universi-  
5 ty of Traditional Chinese Medicine, 117 Meishan Road, Hefei, Anhui, 230009, China;

6 \*Corresponding Author: Huaizhen Liu, The First Affiliated Hospital of Anhui University of  
7 Traditional Chinese Medicine.

8 E-mail: [inkslab@163.com](mailto:inkslab@163.com)

9 TEL:055162850152

## 10 **Abstract:**

11 **Objective:** This research aims to retrospectively probe the association between the  
12 prolactin (PRL) and non-alcoholic fatty liver disease (NAFLD), specifically in type 2  
13 diabetes mellitus(T2DM). **Methods:** There are 406 patients with T2DM have  
14 participated. Based on the ultrasound diagnosis of NAFLD, there are two groups,  
15 named T2DM without NAFLD (men: 77 cases, women: 66 cases, respectively) and  
16 T2DM with NAFLD group (men: 153 cases, women: 110 cases, respectively).  
17 Inter-group comparison was operated separately. Multiple logistic regression analysis  
18 was used to research the relevance between PRL and NAFLD. **Results:** The results  
19 indicated that both men and women, the levels of PRL in the NAFLD group were  
20 significantly lower ( $p < 0.01$ ). In male subjects, the levels of PRL were negatively  
21 correlated with hipline, homeostasis model assessment for insulin resistance  
22 (C-peptide) and triglyceeide (TG), and inversely related with high density lipoprotein.  
23 In female subjects, PRL levels were negatively related with body mass index,  
24 diastolic pressure, waistline, hipline and TG ( $p < 0.05$  or  $p < 0.01$ ). Logistic regression  
25 analysis revealed a negative relationship between PRL and NAFLD (men:  $p = 0.031$ ,  
26 women:  $p = 0.004$ , respectively). As PRL levels increased, NAFLD prevalence  
27 decreased in both genders ( $p < 0.05$ ). **Conclusion:** Low levels of PRL in physiological  
28 range was a risk factor for NAFLD in T2DM, independent of known metabolic risk  
29 factors.

30 **Keywords:** Type 2 diabetes mellitus; Non-alcoholic fatty liver disease; Prolactin;

## 31 **Introduction**

Running title: prolactin and fatty liver disease

32 The liver is an important organ of glycolipid metabolism in the body. When the  
33 triglyceride deposition in hepatocytes increases and the content exceeds 5%, and other  
34 factors causing liver steatosis (such as drinking alcohol and viral hepatitis, etc) are  
35 excluded, it can be diagnosed as NAFLD[1]. In China, with the gradual improvement  
36 of living standards, NAFLD has surpassed chronic viral hepatitis and become the  
37 primary cause of chronic liver diseases[2]. Nowadays, global incidence of NAFLD is  
38 25.2%[3], while the prevalence of NAFLD diagnosed by ultrasound in T2DM patients  
39 is 73.7%[4]. T2DM can boost to the development of NAFLD to non-alcoholic  
40 steatohepatitis (NASH), even liver fibrosis[1].

41 Risk factors of NAFLD include central obesity, hypertension, hyperlipidemia,  
42 T2DM and metabolic syndrome (Met S), etc[5]. Among Met S related diseases, only  
43 NAFLD is considered as a strong predictor of Met S, and the incidence of Met S in  
44 fatty liver patients is more than 4 times that of non-fatty liver patients [6]. Therefore,  
45 NAFLD is considered as the expression of Met S in liver.

46 Prolactin (PRL) is a kind of protein hormone mainly secreted by adenohypophy-  
47 sis. Its main physiological function is to stimulate breast development and milk scere-  
48 ion [7]. Its receptors are widely distributed in various tissues and organs of the body,  
49 including fat, liver, pancreas and so on [8]. PRL can increase the proliferation of  $\beta$   
50 cells, stimulate insulin secretion and participate in the regulation of glucose  
51 metabolism [9]. PRL can also inhibit lipolysis and activate adipocyte differentiation  
52 by activating peroxisome proliferator-activated receptor  $\gamma$  [10]. Therefore, studies at  
53 home and abroad had found that the decrease of serum PRL at physiological level was  
54 closely related to the occurrence of T2DM. Wang et al[11] discovered that the PRL  
55 levels of patients with T2DM and impaired glucose regulation were significantly  
56 lower than that of people with normal glucose metabolism. The researchers further  
57 pointed out that the decrease of PRL physiological level was related to the increased  
58 risk of T2DM[9]. Manshaei et al[12] also found that the serum PRL concentration of  
59 T2DM patients was lower than that of healthy people. Because of the high incidence  
60 of NAFLD in T2DM patients, T2DM is also an important part of Met S. The

Running title: prolactin and fatty liver disease

relationship among PRL, NAFLD and Met S physiological level has not been explored. The goal of this research is to explore the relationship among PRL, NAFLD and Met S in patients with T2DM.

## **Materials and Methods**

### **Research objects**

From November 2018 to December 2019, 656 T2DM patients were selected for hospitalization in our hospital. The diagnosis of T2DM was based on the diagnostic criteria proposed by the WHO Diabetes Expert Committee in 1999. The PRL levels at physiological level are based on the normal reference range of our hospital, that is 2.78-29.20 ng/mL for premenopausal women, 1.79-20.28 ng/mL for menopausal women and 2.12-17.69 ng/mL for men. This study was a retrospective research, so it was exempted from informed consent with the approval of the Ethics Committee of The First Affiliated Hospital of Anhui University of Traditional Chinese Medicine.

Exclus-

ion standard: using drugs that affect PRL (metoclopramide, methyl dopa, opiates, and imetidine) (n=15), pituitary diseases (n=4), the levels of thyroid stimulating hormone, cortisol, estradiol and testosterone are higher than the normal range (30), hyperprolactinemia (n=5), too much drink (n=56), cancer (n=11), gestation (n=5) and suffering from type 1 diabetes (n=7), diabetes mellitus complicated with acute complications (n=25), acute cardiovascular accidents (n=15), severe hepatic and renal insufficiency (n=30), suffering from viral (n=8), alcoholic (n=30), drug-damaged (n=5) and autoimmune liver diseases (n=4). Ultimately, 406 patients with T2DM (230 men and 176 women) were taken into the research.

### **General clinical message and laboratory test targets**

We collected gender, age, menopausal history of women, height, weight, diabetes course, pre-admission hypoglycemic plan (include metformin, insulin and other hypoglycemic drugs such as sulfonylureas, glinides, thiazolidinediones,  $\alpha$ -glucosidase inhibitors, glucagon-like peptide-1 receptor agonists, dipeptidyl peptidase 4 inhibitors, sodium-glucose cotransporter protein 2 inhibitors), history of drinking, complicated

Running title: prolactin and fatty liver disease

with cancer, other liver diseases history, waistline, hipline, blood pressure data. All patients' morning venous blood samples were collected on the second day after admission and all blood were extracted with a centrifuge. After separation of serum, fasting blood glucose (FBG), blood fat, liver and kidney function were measured using an automatic biochemical analyzer (7600-020; Hitachi). Fasting C-peptide (FCP) was examined using enzyme-linked immunosorbent assay (A2000 Plus; Autolumo). Adopting automated chemiluminescent immunoassay (Siemens Immulite 2000, UK) was to measure PRL. The coefficients of intra-assay and inter-assay variation were between 2.49-3.47% and 2.91-3.14%, respectively. PRL levels are affected by many conditions including various drugs, stress, and exercise, so we drew fasting blood samples on different days when the patients were at rest, and then took the average of two values. High-performance liquid chromatography was used to check glycosylated hemoglobin (HbA1c) (Variant II; Bio-Rad).

#### **Defining, count and group**

NAFLD was diagnosed as ultrasound[13] by a senior technician. The ultrasonic diagnosis of fatty liver is as follows: near-field of liver permeate punctiform hyperecho, the composition of the intrahepatic duct is not clearly demonstrated by ultrasonography, and weak echo in the distal echo. Diagnosis of NAFLD is based on following requirements: no drinking history; in addition to other types of liver diseases; unsolvable serum alanine aminotransferase (ALT) or aspartic acid aminotransferase (AST)、 glutamyltransferase (GGT) continued to increase over 6 months[14].

Diagnosis of Met S conforms to the standard which is put forward in the ninth edition of internal medicine in China [15], and the diagnostic standard is the following three or more items: ① central obesity and/or abdominal obesity: waistline is 90cm for men and 85cm for women; ② Hyperglycemia: FBG > 6.1mmol/L or blood glucose 2 hours after sugar load >7.8mmol/L and/or those are confirmed as diabetes and treated with hypoglycemic therapy; ③ Hypertension: blood pressure exceeds 130/85 mmHg and/or those are diagnosed as hypertension and treated with an antihypertensive therapy; ④ fasting triglyceride (TG) surpasses 1.7mmol/l; ⑤ fasting high density lipoprotein (HDL). belows 1.04mmol/l. Body mass index (BMI) was computed by

Running title: prolactin and fatty liver disease

121 dividing the body weight (kg) by the square of the height (m<sup>2</sup>). homeostasis model  
122 assessment for insulin resistance (C-peptide) (HOMA-IR (CP)) was reckoned by FCP  
123 substitute for fasting insulin, HOMA-IR (CP) = 1.5 + FBG (mmol/L) × FCP (pmol/L) /  
124 2800. HOMA-β (CP-DM) = 0.27 × FCP (pmol/L) / (FBG (mmol /L) - 3.5)[16].

125 In conformity with ultrasonic diagnosis, patients with T2DM who met the  
126 inclusion criteria were segmented into without NAFLD group (men: 77 cases,  
127 women: 66 cases, respectively) and with NAFLD group (men: 153 cases, women: 110  
128 cases, respectively).

### 129 **Patient and Public Involvement**

130 Patients or the public were not involved in the design, or conduct, or reporting,  
131 or dissemination plans of our research.

### 132 **Statistical analysis**

133 SPSS21.0 statistical software was used for the data analysis and the  
134 Kolmogorov-Smirnov normality of all data were tested. The measured data of the  
135 normal distribution was represented by mean ± SD. Comparisons were conducted  
136 between two groups and the comparing process was finished by making full use of  
137 independent T test. Measurement data for non-normal distributions were expressed as  
138 medians (interquartile intervals). Under this situation, two groups were compared by  
139 using the Mann-Whitney rank sum test. Counting data was shown by the number of  
140 cases, the Chi-square test was adopted to demonstrate the differences within two or  
141 more groups. Spearman correlation analysis compared the relationship between PRL  
142 levels and other variables. The links among PRL, NAFLD and Met S were analyzed  
143 by logistic regression. P < 0.05 or P < 0.01 represented the obvious differences in  
144 statistics.

### 145 **Results**

#### 146 **1. Comparison of general message and laboratory test targets in each group**

147 The ultrasonic diagnostic rate of NAFLD was 263 cases (153 plus 110 cases)  
148 (64.8%) (Table 1). Men cases with NAFLD group had younger age, and higher BMI,  
149 waistline, hip line, diastolic pressure (DBP), GGT, FBG, TG, total cholesterol



Running title: prolactin and fatty liver disease

150 (TC)、 low density lipoprotein (LDL)、 HOMA-IR (CP)、 HbA1C、 the incidence of  
 151 Met S. Women patients with NAFLD group also had higher BMI、 ALT、 GGT、 TG、  
 152 HOMA-IR (CP) 、 HbA1C 、 the incidence of Met S. While HDL and PRL were  
 153 markedly reduced in the cases merged-NAFLD than without NAFLD in both genders  
 154 ( $p<0.05$  or  $p<0.01$ ). In terms of medication history, there was no statistical difference  
 155 between the two groups of male and female patients in the treatment of hypoglycemic  
 156 programs, which could exclude the influence of hypoglycemic drugs on the study.

157 Table 1 Comparison of general material and biochemical indexes of each group

|                          | Men                   |                    |            | Women                 |                    |            |
|--------------------------|-----------------------|--------------------|------------|-----------------------|--------------------|------------|
|                          | T2DM without<br>NAFLD | T2DM with<br>NAFLD | P<br>value | T2DM without<br>NAFLD | T2DM with<br>NAFLD | P<br>value |
| N                        | 77                    | 153                |            | 66                    | 110                |            |
| Age(years)               | 63(54-63)             | 54(48-62)          | 0.000      | 65(57-71)             | 61(55-69)          | 0.077      |
| Metabolic syndrome(%)    | 64.9                  | 85.6               | 0.000      | 59.100                | 80.000             | 0.003      |
| Menopause(%)             | NA                    | NA                 |            | 99.100                | 83.600             | 0.117      |
| Diabetes course(years)   | 10(3-15)              | 8(3-12)            | 0.280      | 10(5-20)              | 10(4-15)           | 0.070      |
| BMI(kg/m <sup>2</sup> )  | 24.90±2.97            | 27.18±2.94         | 0.000      | 24.54±3.35            | 26.33±3.55         | 0.000      |
| Systolic pressure(mmHg)  | 130(125-146)          | 132(121-145)       | 0.880      | 130(124-151)          | 130(123-144)       | 0.233      |
| Diastolic pressure(mmHg) | 81.48±9.59            | 85.80±9.94         | 0.002      | 80.48±8.59            | 79.07±8.16         | 0.277      |
| Waistline(cm)            | 90.71±8.02            | 96.29±8.45         | 0.000      | 89.02±9.07            | 91.38±9.41         | 0.103      |
| Hipline(cm)              | 96.64±6.77            | 100.66±6.18        | 0.000      | 97.00±6.52            | 97.73±7.81         | 0.526      |
| ALT(U/L)                 | 19(13-28)             | 21(15-32)          | 0.082      | 15(12-21)             | 19(14-33)          | 0.000      |
| AST(U/L)                 | 18(15-23)             | 19(15-23)          | 0.881      | 17(15-20)             | 18(15-25)          | 0.094      |
| GGT (U/L)                | 24(17-36)             | 35(23-56)          | 0.000      | 19(14-28)             | 25(19-35)          | 0.000      |
| FBG (mmol/L)             | 6.81(5.41-9.49)       | 7.80(6.21-11.0)    | 0.002      | 6.61(5.48-9.34)       | 7.89(6.05-10.96)   | 0.050      |
| TG (mmol/L)              | 1.20(0.79-1.75)       | 2.01(1.42-3.27)    | 0.000      | 1.23(0.93-1.50)       | 1.81(1.19-2.35)    | 0.000      |
| TC(mmol/L)               | 4.32±0.92             | 4.83±1.10          | 0.001      | 4.77±1.24             | 5.02±1.11          | 0.158      |
| HDL (mmol/L)             | 1.04(0.96-1.18)       | 0.97(0.82-1.11)    | 0.004      | 1.23(1.05-1.47)       | 1.10(0.99-1.28)    | 0.002      |
| LDL (mmol/L)             | 2.45±0.78             | 2.78±0.85          | 0.004      | 2.84±1.05             | 2.98±0.88          | 0.373      |
| HOMA-IR(CP)              | 2.90(2.46-3.97)       | 3.99(3.18-5.20)    | 0.000      | 2.97(2.54-3.68)       | 3.68(2.91-4.41)    | 0.001      |
| HOMA-β(CP-DM)            | 46.94(25.29-88.92)    | 44.33(27.17-83.92) | 0.686      | 38.55(22.52-80.19)    | 48.27(25.02-73.90) | 0.553      |
| HbA1C (%)                | 7.5(6.7-9.1)          | 8.3(7.0-9.7)       | 0.043      | 7.7(6.7-9.3)          | 8.5(7.4-9.9)       | 0.020      |
| PRL(ng/mL)               | 10.36(9.35-14.72)     | 9.56(7.81-12.60)   | 0.001      | 12.97(10.03-16.58)    | 10.38(8.43-14.27)  | 0.001      |
| Hypoglycemic plan        |                       |                    |            |                       |                    |            |
| Metformin                | 26(33.8%)             | 62(40.5%)          |            | 17(25.8%)             | 43(39.1%)          |            |
| Other hypoglycemic drugs | 16(20.8%)             | 44(28.8%)          | 0.083      | 23(34.8%)             | 27(24.5%)          | 0.150      |
| Insulin                  | 35(45.4%)             | 47(30.7%)          |            | 26(39.4%)             | 40(36.4%)          |            |

158 Note: NAFLD, Nonalcoholic fatty liver disease; T2DM, Type 2 diabetes mellitus; BMI, Body mass index; ALT, Alanine aminotransferase; AST, Aspartic acid

## Running title: prolactin and fatty liver disease

159 aminotransferase; GGT, Glutamyltransferase; FBG, Fasting blood glucose; TG, Triglyceride; TC, Total cholesterol; HDL, High density lipoprotein; LDL, Low  
 160 density lipoprotein; HOMA-IR(CP), homeostasis model assessment for insulin resistance(C-peptide); HOMA-β(CP-DM): homeostasis model assessment for  
 161 beta(C-peptide- diabetes mellitus); HbA1c, Glycosylated hemoglobin; PRL, prolactin. The measured data of the normal distribution was represented by mean±SD.  
 162 Measurement data for non-normal distributions were expressed as medians (interquartile intervals).<sup>1</sup>

163 Because women's serum PRL is affected by menopause or not, we analyzed the  
 164 metabolic status and PRL levels of female patients with or without NAFLD before  
 165 and after menopause (Table 2). Premenopausal women with NAFLD had higher BMI,  
 166 FBG、TG、HbA1C and the incidence of Met S. Postmenopausal women with  
 167 NAFLD had higher BMI、ALT、GGT、TG、HOMA-IR (CP) and the incidence of  
 168 Met S, while HDL and PRL were markedly reduced in the cases merged-NAFLD than  
 169 without NAFLD (p<0.05 or p<0.01).

170 Table 2 Comparison of clinical data of women with and without NAFLD before and  
 171 after menopause

|                          | Premenopause          |                    |            | Postmenopause         |                    |            |
|--------------------------|-----------------------|--------------------|------------|-----------------------|--------------------|------------|
|                          | T2DM without<br>NAFLD | T2DM with<br>NAFLD | P<br>value | T2DM without<br>NAFLD | T2DM with<br>NAFLD | P<br>value |
| N                        | 6                     | 18                 |            | 60                    | 92                 |            |
| Age(years)               | 44.80±3.76            | 45.20±4.37         | 0.848      | 66.15±8.34            | 64.61±8.16         | 0.261      |
| Metabolic syndrome(%)    | 0                     | 77.8               | 0.001      | 65                    | 80.4               | 0.033      |
| Diabetes course(years)   | 8.180±6.69            | 4.78±4.12          | 0.149      | 12.86±9.02            | 10.69±6.88         | 0.116      |
| BMI(kg/m <sup>2</sup> )  | 22.80±3.87            | 26.70±3.43         | 0.029      | 24.71±3.28            | 26.26±3.59         | 0.008      |
| Systolic pressure(mmHg)  | 121.83±7.08           | 128.50±8.78        | 0.107      | 133(127-152)          | 131(122-145)       | 0.167      |
| Diastolic pressure(mmHg) | 77.50±7.18            | 84.06±6.78         | 0.055      | 80.78±8.71            | 78.10±8.08         | 0.054      |
| Waistline(cm)            | 80.33±12.36           | 89.06±7.92         | 0.055      | 89.88±8.32            | 91.84±9.65         | 0.200      |
| Hipline(cm)              | 94.67±6.83            | 95.61±7.65         | 0.791      | 97.23±6.50            | 98.14±7.81         | 0.456      |
| ALT(U/L)                 | 13(11-16)             | 15(13-45)          | 0.121      | 15(12-22)             | 20(15-33)          | 0.000      |
| AST(U/L)                 | 16(15-18)             | 16(13-35)          | 1.000      | 17(15-20)             | 19(16-25)          | 0.073      |
| GGT (U/L)                | 20.67±14.28           | 37.67±31.34        | 0.217      | 19(14-29)             | 26(18-35)          | 0.002      |
| FBG (mmol/L)             | 6.61±1.59             | 10.99±3.10         | 0.003      | 7.81±2.97             | 8.08±2.78          | 0.566      |
| TG (mmol/L)              | 1.09(0.63-1.30)       | 2.02(1.37-2.83)    | 0.003      | 1.24(0.93-1.56)       | 1.74(1.17-2.34)    | 0.000      |
| TC(mmol/L)               | 4.77±0.84             | 5.16±1.46          | 0.534      | 4.77±1.28             | 4.99±1.04          | 0.229      |
| HDL (mmol/L)             | 1.23±0.17             | 1.06±0.21          | 0.086      | 1.27±0.29             | 1.14±0.27          | 0.005      |
| LDL (mmol/L)             | 2.92±0.83             | 2.84±0.86          | 0.838      | 2.84±1.08             | 3.00±0.89          | 0.301      |
| HOMA-IR(CP)              | 2.30±0.57             | 4.87±2.98          | 0.051      | 3.28±1.00             | 3.73±1.43          | 0.036      |

## Running title: prolactin and fatty liver disease

|               |                    |                    |       |                    |                    |       |
|---------------|--------------------|--------------------|-------|--------------------|--------------------|-------|
| HOMA-β(CP-DM) | 25.07(19.86-28.67) | 25.99(13.78-56.47) | 0.689 | 47.00(22.63-85.05) | 51.60(28.83-75.27) | 0.505 |
| HbA1C (%)     | 7.62±0.89          | 9.53±1.66          | 0.014 | 8.16±1.82          | 8.53±1.67          | 0.196 |
| PRL(ng/mL)    | 18.92±8.57         | 14.54±4.64         | 0.122 | 13.16±3.79         | 10.88±3.77         | 0.000 |

172 Note: NAFLD, Nonalcoholic fatty liver disease; T2DM, Type 2 diabetes mellitus; BMI, Body mass index; ALT, Alanine aminotransferase; AST, Aspartic acid  
 173 aminotransferase; GGT, Glutamyltransferase; FBG, Fasting blood glucose; TG, Triglyceride; TC, Total cholesterol; HDL, High density lipoprotein; LDL, Low  
 174 density lipoprotein; HOMA-IR(CP), homeostasis model assessment for insulin resistance(C-peptide); HOMA-β(CP-DM): homeostasis model assessment for  
 175 beta(C-peptide- diabetes mellitus); HbA1c, Glycosylated hemoglobin; PRL, prolactin. The measured data of the normal distribution was represented by mean±SD.  
 176 Measurement data for non-normal distributions were expressed as medians (interquartile intervals).<sup>2</sup>

## 177 2. Relationship between PRL levels and related parameters of Met S

178 We further discussed the relationship between PRL levels and related parameters  
 179 of Met S (Table 3). We found that in male subjects, the levels of PRL were negatively  
 180 correlated with hipline, TG and HOMA-IR (CP), and positively associated with HDL,  
 181 in female subjects, PRL levels were negatively related with BMI, DBP, waistline,  
 182 hipline and TG ( $p < 0.05$  or  $p < 0.01$ ).

183 Table 3 Relationship between PRL levels and related parameters of Met S

|                    | Men    |         | Women  |         |
|--------------------|--------|---------|--------|---------|
|                    | r      | P value | r      | P value |
| BMI                | -0.092 | 0.166   | -0.192 | 0.011   |
| Systolic pressure  | 0.046  | 0.492   | -0.045 | 0.552   |
| Diastolic pressure | -0.125 | 0.059   | -0.220 | 0.003   |
| Waistline          | -0.056 | 0.398   | -0.152 | 0.044   |
| Hipline            | -0.141 | 0.032   | -0.157 | 0.037   |
| FBG                | -0.109 | 0.098   | -0.034 | 0.654   |
| TG                 | -0.252 | 0.000   | -0.258 | 0.001   |
| TC                 | -0.096 | 0.146   | -0.061 | 0.421   |
| HDL                | 0.147  | 0.025   | 0.065  | 0.390   |
| LDL                | -0.042 | 0.528   | -0.110 | 0.146   |
| HOMA-IR(CP)        | -0.141 | 0.032   | -0.049 | 0.519   |
| HOMA-β(CP-DM)      | 0.019  | 0.772   | -0.044 | 0.562   |
| HbA1C              | -0.091 | 0.168   | 0.057  | 0.450   |

184 Note: Met S, metabolic syndrome; BMI, Body mass index; FBG, Fasting blood glucose; TG, Triglyceride; TC, Total cholesterol; HDL, High density  
 185 lipoprotein; LDL, Low density lipoprotein; HOMA-IR(CP), homeostasis model assessment for insulin resistance(C-peptide); HOMA-β(CP-DM): homeostasis  
 186 model assessment for beta(C-peptide- diabetes mellitus); HbA1c, Glycosylated hemoglobin; PRL, prolactin.; PRL, prolactin.

## 187 3. Multiple factors logistic regression analysis of serum PRL levels and NAFLD 188 risk

Running title: prolactin and fatty liver disease

189 The risk factors for NAFLD were assessed using multiple logistic regression  
 190 analysis, which included age, BMI, menopause, TG, LDL as well as HOMA-IR (CP),  
 191 HbA1C and PRL levels as variables. We found that PRL levels were independently  
 192 negative associated with NAFLD in both men and women (odds ratio (OR): 0.891,  
 193 95% confidence interval (CI): 0.803-0.989,  $p=0.031$ , for men; OR: 0.874, 95% (CI):  
 194 0.797-0.957,  $p=0.004$ , for women). Other risk factors included age, BMI, LDL and  
 195 HOMA-IR (CP) for men, and TG for women (Table 4).

196 Table 4 Multivariate logistic regression analysis of serum PRL levels and NAFLD risk

|             | Men     |                    |         | Women   |                    |         |
|-------------|---------|--------------------|---------|---------|--------------------|---------|
|             | $\beta$ | OR(95%CI)          | p value | $\beta$ | OR(95%CI)          | p value |
| Age         | -0.045  | 0.956(0.924-0.989) | 0.010   | -0.044  | 0.957(0.912-1.004) | 0.070   |
| BMI         | 0.255   | 1.291(1.122-1.484) | 0.000   | 0.090   | 1.094(0.97-1.224)  | 0.120   |
| Menopause   |         |                    |         | 0.213   | 1.237(0.281-5.441) | 0.778   |
| TG          | 0.176   | 1.193(0.959-1.483) | 0.113   | 0.981   | 2.666(1.404-5.064) | 0.003   |
| LDL         | 0.493   | 1.637(1.046-2.561) | 0.031   | -0.121  | 0.886(0.596-1.318) | 0.550   |
| HOMA-IR(CP) | 0.360   | 1.134(1.062-1.936) | 0.019   | 0.215   | 1.240(0.859-1.788) | 0.250   |
| HbA1C       | 0.057   | 1.059(0.872-1.287) | 0.564   | 0.047   | 1.048(0.840-1.308) | 0.676   |
| PRL         | -0.115  | 0.891(0.803-0.989) | 0.031   | -0.135  | 0.874(0.797-0.957) | 0.004   |

197 Note: The risk factors for NAFLD were assessed using multiple logistic regression analysis in men and women. The ORs with corresponding 95% CIs were  
 198 adjusted for age, BMI, menopause, TG, LDL as well as HOMA-IR (CP), HbA1C and PRL levels as variables. NAFLD, Nonalcoholic fatty liver disease; BMI, Body mass  
 199 index; FBG, Fasting blood glucose; TG, Triglyceride; LDL, Low density lipoprotein; HOMA-IR (CP), homeostasis model assessment for insulin  
 200 resistance (C-peptide); HbA1c, Glycosylated hemoglobin; PRL, prolactin. OR: Odds ratio; CI: Confidence

#### 201 4. Relationship between PRL levels and the prevalence of NAFLD and Met S

202 According to the quartile of PRL levels, the subjects were divided into four groups:  
 203 T1 < 8.29 (n= 57 cases)、 8.29 ≤ T2 < 9.93 (n= 58 cases)、 9.93 ≤ T3 < 12.68 (n=  
 204 57 cases)、 T4 ≥ 12.68 (n= 58 cases) ng/mL in men (n= 230 cases) and T1 < 8.95 (n=  
 205 44 cases)、 8.95 ≤ T2 < 11.32 (n= 44 cases)、 11.32 ≤ T3 < 14.95 (n= 44 cases)、 T4 ≥  
 206 14.95 (n= 44 cases) ng/mL in women (n= 176 cases). Chi-square test was used to  
 207 compare the prevalence and composition ratio among different groups. The  
 208 prevalence of NAFLD had a decreasing trend with the rise of the quartile of PRL in  
 209 both genders (T1: 84.2%, T2: 63.8%, T3: 59.6%, T4: 58.6%,  $p=0.012$  in men; T1:  
 210 79.5%, T2:  
 211 65.9%, T3: 54.5%, T4: 50%,  $p=0.013$  in women). However, the prevalence rates of  
 212 Met S were T1: 86%, T2: 79.3%, T3: 77.2%, T4: 72.4%,  $p=0.354$  in men; T1: 84.1%,

Running title: prolactin and fatty liver disease

213 T2: 70.5%, T3: 77.3%, T4: 56.8%,  $p=0.031$  in women. Therefore, in female subjects,  
214 the prevalence rates of Met S in the fourth quartile groups of PRL were significantly  
215 lower than those in the first, second and third group.

## 216 Discussion

217 At present, due to the rapid increase in the incidence of obesity and obesity-relat-  
218 ed diseases, NAFLD has become an important public health problem[17] NAFLD is  
219 considered as the manifestation of Met S in liver, especially in T2DM patients [18]. In  
220 this study, it was found that the incidence of NAFLD diagnosed by abdominal liver  
221 color doppler ultrasound was 64.8%. Compared with non-NAFLD patients, NAFLD  
222 patients had higher BMI, TG, GGT, HOMA-IR (CP), HbA1C, incidence of Met S and  
223 lower HDL in both genders. Equally, Zhang et al[19] also got similar results. Among  
224 which BMI, TG and HDL were the components of Met S. Therefore, cases in T2DM  
225 complicated NAFLD were easy to promote the abnormality of metabolic indexes.

226 PRL is considered as a hormone closely related to metabolism [20]. Recent  
227 findings have displayed that there had been close association between PRL and  
228 T2DM. Across sectional study included 2377 adult community population (excluding  
229 hyperprolactinemia), and found that cases with impaired glucose regulation and  
230 T2DM had lower PRL levels. Researchers rectified age, sex, BMI and other  
231 confounding factors, still discovered that the risk of above-mentioned people with  
232 high serum PRL was significantly reduced [11]. Further follow-up of 3.7 years, it  
233 was revealed that female cases had a lower risk of T2DM in the highest quartile PRL  
234 levels, with a risk ratio of 0.48[9]. Another cross-sectional study also found that the  
235 risk of Met S and T2DM in women with lower baseline PRL increased[21]. A large  
236 meta-analysis indicated that higher serum PRL levels in normal range were related  
237 with low level of T2DM risk[22]. At the same time, Jha et al[23] also found that  
238 serum PRL had a significant correlation with liver disease and predicted its mortality.  
239 In adipose tissue, PRL intervention can reduce the production of malonyl coenzyme A  
240 in human primary adipocytes, thus inhibiting the restart of triglyceride synthesis [24].  
241 PRL receptor can also directly inhibit the expression of fatty acid synthetase and fatty  
242 acid synthesis in 3T3L1 cells[25]. PRL reduced the accumulation of triglyceride in

Running title: prolactin and fatty liver disease

243 liver through PRL receptor, thus improving liver steatosis [10]. These results indicate  
244 that higher PRL levels had positive protective effect on glucose and lipid metabolism.

245 Considering that PRL secretion may be different due to gender, we studied male  
246 and female subjects separately. We found that compared with non-NAFLD patients,  
247 the PRL value of NAFLD patients was lower in both genders. The age, BMI, TG,  
248 LDL, HOMA-IR (CP), HbA1C were corrected, at the same time, female subjects cor-  
249 rected menopause factors, the study suggested that PRL levels had negative relation  
250 to the risk of NAFLD. In line with the quartile of PRL, the incidence of NAFLD  
251 showed a generally downturn with the increase of PRL levels in both genders. Zhang  
252 et al[26] noted that PRL increased by one standard deviation, the risk of male NAFLD  
253 patients decreased by 12.3%, and that of female patients decreased by 21.4%. PRL  
254 was proved to be a protective factor, which affected the existence and progress of  
255 NAFLD. In another study, Zhang et al[19] also found that the PRL levels of NAFLD  
256 patients diagnosed by ultrasound were significantly lower than that of non-NAFLD  
257 patients, whether male or female. In addition, with the increase of PRL quartile, the  
258 incidence of NAFLD decreased. All subjects were corrected for age, sex, BMI, insulin  
259 resistance, HbA1C, diabetes and other factors. The results showed that PRL had  
260 contrary associated with NAFLD. We took into consideration that PRL levels are  
261 affected by many conditions including various drugs, stress, and exercise. We ruled  
262 out the following cases: such as using drugs that affect PRL (metoclopramide,  
263 methyl-  
264 dopa, opiates, and cimetidine), the levels of thyroid stimulating hormone, cortisol,  
265 estradiol and testosterone are higher than the normal range. In terms of medication  
266 history, there was no statistical difference between the two groups of male and female  
267 patients in the treatment of hypoglycemic programs, which could exclude the  
268 influence of hypoglycemic drugs on the study.

269 In the meantime, the secretion of PRL may be affected by whether women were  
270 menopausal or not, this paper analyze the menopausal and non-menopausal subtypes  
271 of women, we found that postmenopausal women with NAFLD had lower PRL  
272 levels. In addition, Zhang Zhuzi et al[27] divided the included women into



Running title: prolactin and fatty liver disease

premenopausal group and postmenopausal group, and also found that in both groups, PRL of patients with NAFLD was lower than that of patients without NAFLD, the decrease of PRL levels in postmenopausal women with NAFLD was more significant. It was suggested that the decrease of PRL in NAFLD patients was affected by menopausal factors.

Researchs have shown a correlation between PRL levels and the components of Met S, which could explain the role of PRL in NAFLD. According to the basic researchs, in the obese mouse model induced by high-fat diet, severe metabolic changes would occur in mice with PRL receptor failure. Injection of PRL could improve insulin sensitivity and prevent visceral adipocyte hypertrophy [28]. Clinical studies had found that low serum PRL levels in physiological range was related to poor metabolic outcome of Met S and T2DM[11]. In overweight and obese men, serum PRL levels were lower [28]. Friedrich et al[29] found that PRL levels were negatively correlated with waistline in 1857 healthy women aged 20-79. The endocrine characteristics of Met S and polycystic ovary syndrome (PCOS) have a relatively high coincidence rate [30]. A systematic retrospective analysis of 2052 PCOS patients found that the lower the serum PRL, the higher the BMI. PRL had opposite related with TG, TC and LDL-C [31]. Arterial hypertension is a component of Met S. A prospective study of 874 postmenopausal women found that PRL levels increased by 1 standard deviation during 8 years of follow-up, and the relative risk of hypertension was 1.31[32]. Our study found that in male subjects, the levels of PRL were negatively correlated with hipline, TG and HOMA-IR(CP), and positively associated with HDL, in female subjects, PRL levels were negatively related with BMI, DBP, waistline, hipline and TG. In female subjects, the prevalence rates of Met S in the fourth quartile groups of PRL were significantly lower than those in the first, second and third group. Furthermore, premenopausal and postmenopausal women with NAFLD had higher BMI, TG and the incidence of Met S. As we all know, NAFLD is very common in obese and dyslipidemia patients. Obese individuals produce relatively excessive proinflammatory factors, some of which inhibit the treatment of liver fat and promote the accumulation of lipid in hepatocytes [33]. Dyslipidemia, especially hypertriglyceridemia, may

Running title: prolactin and fatty liver disease

303 subsequently increase the transportation of TG and other fats into hepatocytes, result-  
304 ing in hepatic steatosis [34].

305 As a retrospective analysis, this study has many limitations. First of all, the diag-  
306 nosis of NAFLD is based on ultrasound examination, which cannot distinguish NASH  
307 from fibrosis. Secondly, because this is a cross-sectional study, we can't infer the  
308 direct cause and influence between PRL and NAFLD, and need further mechanical st-  
309 udy to clarify their exact relationship. Thirdly, PRL secretion appears in pulse form,  
310 the best time to draw blood for PRL is from 9: 00 to 11: 00 a.m., and patients should  
311 avoid emotional excitement. Finally, due to the limited number of samples in this  
312 study, the effects of drugs for treating cardiovascular diseases, controlling blood lipid  
313 on PRL levels have not been meditated, which requires further layered analysis in the  
314 future work. Moreover, the small sample size can not reflect the large scale  
315 population based cross-sectional epidemiological study, so it is necessary to increase  
316 the samp-  
317 le size.

### 318 **Conclusions**

319 In a word, our research shows that serum PRL levels are related to NAFLD in  
320 T2DM population in physiological range, and are also connected to known metabolic  
321 risk factors. Our research results may help to predict the risk of developing NAFLD,  
322 so as to better understand the disease, importantly, and to formulate effective preventi-  
323 on strategies.

### 324 **Abbreviations**

325 NAFLD: Nonalcoholic fatty liver disease; T2DM: Type 2 diabetes mellitus; PRL: Prolactin;  
326 Met S: Metabolic syndrome; NASH: Non-alcoholic steatohepatitis; SBP: Systolic pressure;  
327 DBP: Diastolic pressure; BMI: Body mass index; AST: Aspartic acid aminotransferase; ALT:  
328 Alanine aminotransferase; GGT: Glutamyltransferase; FBG: Fasting blood glucose; TG:  
329 Triglyceride; TC: Total cholesterol; HDL: High density lipoprotein; LDL: Low density lipoprotein;  
330 Homa-IR (CP): Modified homeostasis model assessment for insulin resistance (C-peptide);  
331 HOMA- $\beta$  (CP-DM): homeostasis model assessment for beta (C-peptide- diabetes mellitus);  
332 HbA1c: Glycosylated hemoglobin; SD: Standard deviation; OR: Odds ratio; CI: Confidence  
333 interval

### 334 **Footnotes**

### 335 **Contributorship statement**



Running title: prolactin and fatty liver disease

YZ conceived the study, collected clinical data, analyzed and interpreted the data and wrote the manuscript. HL made a revised version. All authors read and agreed to the final version of the manuscript.

### Competing interests

The authors declare that they have no competing interests.

### Funding

This work was supported by priority natural project of Anhui University of Chinese Medicine (2020yfyzc22). The funding bodies played no role in the design of the study and collection, analysis, and interpretation of data and in writing the manuscript.

### Data Sharing Statement

All data generated or analyzed during this study are included in the article. The data that support this study are available from the corresponding author only upon reasonable request, once the study has been published.

### Ethics approval and consent to participate

This study was a retrospective research, so it was exempted from informed consent with the approval of the Ethics Committee of The First Affiliated Hospital of Anhui University of Traditional Chinese Medicine (2020MCZQ09).

### References

- [1] Anstee QM, Targher G, Day CP (2013) Progression of NAFLD to diabetes mellitus, cardiovascular disease or cirrhosis. *Nat Rev Gastroenterol Hepatol* 10:330-344.
- [2] Wan FS, Fan JG, Zhang Z, Gao B, Wang HY (2014) The global burden of liver disease: the major impact of China. *Hepatology* 60: 2099-2108.
- [3] Younossi ZM, Koenig AB, Abdelatif D, Fazel Y, Henry L, et al. (2016) Global epidemiology of nonalcoholic fatty liver disease. Meta-analytic assessment of prevalence, incidence and outcomes. *Hepatology* 64: 73-84.
- [4] Mantovani A, Turino T, Lando MG, Gjini K, Byrne CD, et al. (2020) Screening for non-alcoholic fatty liver disease using liver stiffness measurement and its association with chronic kidney disease and cardiovascular complications in patients with type 2

Running title: prolactin and fatty liver disease

- 365 diabetes. *Diabetes Metab* 46: 296-303.
- 366 [5] Riella ME (2015) Nonalcoholic fatty liver disease: a systematic review. *Jama* 313  
367 : 2263-2273.
- 368 [6] Pappachan JM, Babu S, Krishnan B, Ravindran NC (2017) Non-alcoholic Fatty  
369 Liver Disease: A Clinical Update. *J Clin Transl Hepatol* 28: 384-393.
- 370 [7] Goffin V, Binart N, Touraine P, et al. (2002) Prolactin: the new biology of an old  
371 hormone. *Annu Rev Physiol* 64: 47-67.
- 372 [8] Yip SH, Romanò N, Gustafson P, Kelly PA (2019) Elevated prolactin during  
373 pregnancy drives a phenotypic switch in mouse hypothalamic dopaminergic  
374 neurons. *Cell Rep* 26: 1787 - 1799.
- 375 [9] Wang T, Xu Y, Xu M, Ning G, Lu J, et al. (2016) Circulating prolactin and risk of  
376 type 2 diabetes: A prospective study. *Am J Epidemiol* 184: 295 - 301.
- 377 [10] Shao SS, Yao ZY, Lu JY, Song YF, He Z, et al. (2018) Ablation of prolactin  
378 receptor increases hepatic triglyceride accumulation. *Biochem Biophys Res*  
379 *Commun* 498: 693 - 699.
- 380 [11] Wang TG, Lu JL, Xu Y, Li M, Sun JC, et al. (2013) Circulating prolactin  
381 associates with diabetes and impaired glucose regulation: a population-based study.  
382 *Diabetes Care* 36: 1974-1980.
- 383 [12] Manshaei N, Shakibaei F, Fazilati M, Salavatia H, Negahdary M, et al. (2019) An  
384 investigation of the association between the level of prolactin in serum and type II  
385 diabetes. *Diabetes & Metabolic Syndrome* 13: 3035-3041.
- 386 [13] Fan JG, Farrell GC (2009) Epidemiology of non-alcoholic fatty liver disease in  
387 China. *J Hepatol* 50: 204-210.
- 388 [14] Fatty liver and alcoholic liver disease group of hepatology branch of Chinese  
389 Medical Association, expert committee of fatty liver disease of Chinese Medical Doctor  
390 Association (2018) Guidelines for prevention and treatment of nonalcoholic fatty liver  
391 disease (updated in 2018). *J Practical Liver Diseases* 21: 177-186.
- 392 [15] Ge JB, Xu YJ, Wang C (2019) *Internal Medicine (Ninth Edition)*. Beijing People's  
393 Medical Publishing House 942.
- 394 [16] Li X, Zhou ZG, Qi HY, Chen XY, Huang G (2004) Evaluation of insulin resistance

Running title: prolactin and fatty liver disease

- 395 and islet  $\beta$  cell function by using fasting C peptide instead of insulin to improve Homa  
396 formula. *J Cent South Univ* 29:419-423.
- 397 [17]Huang H, Lee SH, Lima IS, Kim SS, Hwang WM, et al. (2018) Rho-kinase/  
398 AMPK axis regulates hepatic lipogenesis during overnutrition. *J Clin Invest* 128:  
399 5335 – 5350.
- 400 [18]Rhee EJ (2019) Nonalcoholic fatty liver disease and diabetes: an epidemiological  
401 perspective. *Endocrinol Metab* 34:226-233.
- 402 [19]Zhang PZ, Ge ZJ, Wang HD, Feng WH, Sun XT, et al. (2018) Prolactin improves  
403 hepatic steatosis via CD36 pathway. *J Hepatol* 68: 1247-1255.
- 404 [20]Jonathan NB, Hugo ER, Brandebourg TD, Lapensee CR (2006) Focus on  
405 prolactin as metabolic hormone. *Trends Endocrinol Metab* 17: 110-116.
- 406 [21]Chirico V, Cannavo S, Lacquaniti A, Salpietro V, Mandolino M, et al. (2013)  
407 Prolactin in obese children: a bridge between inflammation and metabolic-endocrine  
408 dysfunction. *Clin Endocrinol* 79: 537-544.
- 409 [22]Faria de Castro L, Alves dos Santos A, Augusto Casulari L, Anselmi Naves L,  
410 Amorim Amato A, et al. (2020) Association between variations of physiological  
411 prolactin serum levels and the risk of type 2 diabetes: a systematic review and  
412 meta-analysis. *Diabetes Res Clin Pract* 166: 1-26.
- 413 [23]Jha SK, Kannan S (2016) Serum prolactin in patients with liver disease in  
414 comparison with healthy adults: A preliminary cross-sectional study. *Int J Appl Basic*  
415 *Med Res* 6: 1-3.
- 416 [24]Nilsson LA, Roepstoff C, Kiens B, Billig H, Billig H, Ling C (2009) Prolactin  
417 suppresses malonyl-CoA concentration in human adipose tissue. *Horm Metab*  
418 *Res* 41:747-751.
- 419 [25]Hogan JC, Stephens JM (2005) The regulation of fatty acid synthase by STAT5A.  
420 *Diabetes* 54: 1968-1975.
- 421 [26]Zhang PZ, Ge ZJ, Wang HD, Feng WH, Jiang C, et al. (2018) Relationship  
422 between serum prolactin level and nonalcoholic fatty liver disease in overweight and  
423 obese patients. *Chin J Diabetes* 10: 186-192.
- 424 [27]Zhang PZ, Ge ZJ, Wang HD, Feng WH, Jiang C, et al. (2018) Relationship

Running title: prolactin and fatty liver disease

425 between serum prolactin level and nonalcoholic fatty liver disease in overweight and  
426 obese patients. *Chin J Diabetes* 10: 186-192.

427 [28] Ruiz-Herrera XB, de los R' ıos EA, D' ıaz JM, Lerma-Alvarado RM, de la Escalera  
428 LM, et al. (2017) Prolactin Promotes Adipose Tissue Fitness and Insulin Sensitivity in  
429 Obese Males. *Endocrinol* 158: 56-68.

430 [29] Friedrich N, Schneider HJ, Spielhagen C, Markus MR, Haring R, et al. (2011) The  
431 association of serum prolactin concentration with inflammatory biomarkers-cross  
432 -sectional findings from the population-based Study of Health in Pomerania. *Clin*  
433 *Endocrinol* 4: 561-566.

434 [30] Rimmer M, Tan BK, Teede H, Thangaratnam HTS, Wattar BH (2019) Metabolic  
435 inflexibility in women with polycystic ovary syndrome: a systematic review. *Gynecol*  
436 *Endocrinol* 36: 501-507.

437 [31] Yang HY, Di JB, Pan JX, Yu R, Teng YL, et al. (2020) The Association Between  
438 Prolactin and Metabolic Parameters in PCOS Women: A Retrospective Analysis.  
439 *Frontiers in Endocrinology* 11: 263-271.

440 [32] Zhang L, Curhan GC, Forman JP (2010) Plasma prolactin level and risk of  
441 incident hypertension in postmenopausal women. *J Hypertens* 7: 1400 - 1405.

442 [33] Choi S, Diehl AM (2005) Role of inflammation in nonalcoholic steatohepatitis.  
443 *Curr Opin Gastroenterol* 21: 702 - 707.

444 [34] Abram CL, Lowell CA (2009) The ins and outs of leukocyte integrin signaling.  
445 *Annu Rev Immunol* 27: 339 - 362.

# BMJ Open

## Cross-sectional correlations of prolactin levels and nonalcoholic fatty liver disease in patients with type 2 diabetes mellitus: a retrospective analysis of patients from a single hospital in China

|                                 |                                                                                                                                                                 |
|---------------------------------|-----------------------------------------------------------------------------------------------------------------------------------------------------------------|
| Journal:                        | <i>BMJ Open</i>                                                                                                                                                 |
| Manuscript ID                   | bmjopen-2022-062252.R1                                                                                                                                          |
| Article Type:                   | Original research                                                                                                                                               |
| Date Submitted by the Author:   | 16-May-2022                                                                                                                                                     |
| Complete List of Authors:       | Yuanyuan, Zhang; Anhui University of Traditional Chinese Medicine, Liu, Huaizhen; Anhui University of Traditional Chinese Medicine, Department of Endocrinology |
| <b>Primary Subject Heading</b>: | Diabetes and endocrinology                                                                                                                                      |
| Secondary Subject Heading:      | Diabetes and endocrinology, Public health                                                                                                                       |
| Keywords:                       | DIABETES & ENDOCRINOLOGY, General diabetes < DIABETES & ENDOCRINOLOGY, General endocrinology < DIABETES & ENDOCRINOLOGY                                         |
|                                 |                                                                                                                                                                 |

SCHOLARONE™  
Manuscripts



I, the Submitting Author has the right to grant and does grant on behalf of all authors of the Work (as defined in the below author licence), an exclusive licence and/or a non-exclusive licence for contributions from authors who are: i) UK Crown employees; ii) where BMJ has agreed a CC-BY licence shall apply, and/or iii) in accordance with the terms applicable for US Federal Government officers or employees acting as part of their official duties; on a worldwide, perpetual, irrevocable, royalty-free basis to BMJ Publishing Group Ltd ("BMJ") its licensees and where the relevant Journal is co-owned by BMJ to the co-owners of the Journal, to publish the Work in this journal and any other BMJ products and to exploit all rights, as set out in our [licence](#).

The Submitting Author accepts and understands that any supply made under these terms is made by BMJ to the Submitting Author unless you are acting as an employee on behalf of your employer or a postgraduate student of an affiliated institution which is paying any applicable article publishing charge ("APC") for Open Access articles. Where the Submitting Author wishes to make the Work available on an Open Access basis (and intends to pay the relevant APC), the terms of reuse of such Open Access shall be governed by a Creative Commons licence – details of these licences and which [Creative Commons](#) licence will apply to this Work are set out in our licence referred to above.

Other than as permitted in any relevant BMJ Author's Self Archiving Policies, I confirm this Work has not been accepted for publication elsewhere, is not being considered for publication elsewhere and does not duplicate material already published. I confirm all authors consent to publication of this Work and authorise the granting of this licence.

Running title: Prolactin and fatty liver disease

1 Cross-sectional correlations of prolactin levels and nonalcoholic fatty liver disease in  
2 patients with type 2 diabetes mellitus: a retrospective analysis of patients from a  
3 single hospital in China

4 Yuanyuan Zhang<sup>a</sup>, Huaizhen Liu<sup>a\*</sup>

5 <sup>a</sup>Department of Endocrinology, Geriatrics Center, The First Affiliated Hospital of Anhui University  
6 of Traditional Chinese Medicine, 117 Meishan Road, Hefei, Anhui, 230009, China

7 \*Corresponding Author: Huaizhen Liu, The First Affiliated Hospital of Anhui University of  
8 Traditional Chinese Medicine.

9 E-mail: [inkslab@163.com](mailto:inkslab@163.com)

10 TEL:055162850152

### 11 **Abstract:**

12 **Objective:** This research aims to retrospectively assess the association between  
13 prolactin (PRL) and nonalcoholic fatty liver disease (NAFLD), specifically in patients  
14 with type 2 diabetes mellitus (T2DM).

15 **Design and setting:** A cross-sectional study was conducted in Anhui, China.

16 **Participants:** A total of 406 patients with T2DM (153 men, 110 women) were  
17 selected.

18 **Primary and secondary outcome measures:** P values for the independent T test,  
19 Mann - Whitney rank sum test, Spearman correlation analysis, and multiple logistic  
20 regression models were used to explore the association between PRL and NAFLD in  
21 patients with T2DM.

22 **Results:** The results indicated that in both men and women, the levels of PRL were  
23 significantly lower in the T2DM with NAFLD group than that in the T2DM without  
24 NAFLD group (men: 9.56 ng/mL vs. 10.36 ng/mL, women: 10.38 ng/mL vs. 12.97  
25 ng/mL). In male subjects, the levels of PRL were negatively correlated with hip  
26 circumference, homeostasis model assessment for insulin resistance (C-peptide) and  
27 triglyceide (TG), and inversely correlated with high density lipoprotein (HDL)  
28 ( $r=-0.141$ ,  $p=0.032$ ,  $r=-0.141$ ,  $p=0.032$ ,  $r=-0.252$ ,  $p=0.000$ ,  $r=0.147$ ,  $p=0.025$ ,  
29 respectively). In female subjects, PRL levels were negatively related with body mass  
30 index, diastolic blood pressure, waist circumference, hip circumference and TG  
31 ( $r=-0.192$ ,  $p=0.011$ ,  $r=-0.220$ ,  $p=0.003$ ,  $r=-0.152$ ,  $p=0.044$ ,  $r=-0.157$ ,  $p=0.037$ ,

Running title: Prolactin and fatty liver disease

32  $r=-0.258$ ,  $p=0.001$ , respectively). Logistic regression analysis revealed a negative  
33 relationship between PRL and NAFLD (men: OR95% CI: 0.891 (0.803-0.989),  
34  $p=0.031$ , women: OR95% CI: 0.874 (0.797-0.957),  $p=0.004$ , respectively).

35 As PRL levels increased, NAFLD prevalence decreased in both sexes (men:  $p=0.012$ ,  
36 women:  $p=0.013$ , respectively).

37 **Conclusion:** Our results supported that a low levels of PRL in the physiological range  
38 was a markers of NAFLD in T2DM patients and suggested that prolactin within the  
39 biologically high range may play a protective role in the pathogenesis of NAFLD.

40 **Keywords:** Type 2 diabetes mellitus; Nonalcoholic fatty liver disease; Prolactin;

#### 41 **Strengths and limitations of this study**

42 ▶ Abdominal colour ultrasonography is a common and simple method for the clinical  
43 diagnosis of nonalcoholic fatty liver disease (NAFLD).

44 ▶ The normal range of serum prolactin (PRL) levels differs by sex, so we conducted a  
45 sex stratification analysis of patients with type 2 diabetes mellitus (T2DM) and found  
46 that in both men and women, the levels of PRL were significantly lower in the T2DM  
47 with NAFLD group than that in without NAFLD group.

48 ▶ The change of PRL levels promotes medical workers to pay attention to the  
49 occurrence of NAFLD in patients with T2DM.

50 ▶ P values for independent T tests and multiple logistic regression models were used  
51 to assess the association between PRL and NAFLD in patients with T2DM.

52 ▶ This was a cross-sectional study and cannot provide evidence of causal  
53 relationships.

#### 54 **Introduction**

55 The liver is an important organ of glycolipid metabolism in the body. When  
56 triglyceride deposition in hepatocytes increases and exceeds 5% and other factors  
57 causing liver steatosis (such as alcohol consumption and viral hepatitis) are excluded,  
58 NAFLD can be diagnosed[1]. In China, with the gradual improvement of living  
59 standards, NAFLD has surpassed chronic viral hepatitis to become the primary cause  
60 of chronic liver diseases[2]. Currently, the global incidence of NAFLD is 25.2%[3],  
61 while the prevalence of NAFLD diagnosed by ultrasound in patients with T2DM is



Running title: Prolactin and fatty liver disease

73.7%[4]. T2DM is an important factor associated with the progression of NAFLD to NASH and fibrosis[1].

NAFLD is closely related to central obesity, hypertension, hyperlipidaemia, T2DM and metabolic syndrome (MetS)[5]. Among MetS-related diseases, only NAFLD is considered a strong predictor of MetS, and the incidence of MetS in fatty liver patients is more than 4 times that in nonfatty liver patients[6]. Therefore, NAFLD is considered the expression of MetS in the liver.

Prolactin (PRL) is a type of hormone that is mainly secreted by adenohypophysis. Its main physiological function is to stimulate breast development and milk secretion[7]. Its receptors are widely distributed in various tissues and organs of the body, including fat, liver, pancreas and so on [8]. PRL can increase the proliferation of  $\beta$  cells, stimulate insulin secretion and participate in the regulation of glucose metabolism [9]. PRL can also inhibit lipolysis and activate adipocyte differentiation by activating peroxisome proliferator-activated receptor  $\gamma$ [10]. Studies in China and abroad have found that the decrease in serum PRL at the physiological level is closely related to the occurrence of T2DM. Wang et al[11] discovered that the PRL levels of patients with T2DM and impaired glucose regulation were significantly lower than those of people with normal glucose metabolism. The researchers further pointed out that the decrease in physiological levels of PRL was related to an increased risk of T2DM[9]. Manshaei et al[12] also found that the serum PRL concentration of patients with T2DM was lower than that of healthy people. Because of the high incidence of NAFLD in patients with T2DM, T2DM is also an important factor in MetS. The relationship among PRL, NAFLD and MetS at the physiological level has not been explored. The goal of this research was to explore the relationship among PRL, NAFLD and MetS in patients with T2DM.

## Methods

### Participants

All participants in this study were recruited from a hospital located Anhui, China. This was a cross-sectional survey. A total of 656 patients with T2DM were investigated in this study, but 15 participants were excluded due to the use of that

Running title: Prolactin and fatty liver disease

1  
2  
3  
4 92 affect PRL (metoclopramide, methyl dopa, opiates, and imetidine). Thirty participants  
5  
6 93 were excluded because their levels of thyroid-stimulating hormone, cortisol, oestradiol  
7  
8 94 and testosterone were higher than the normal range. Four participants had pituitary  
9  
10 95 diseases, five had hyperglycaemia, 56 exhibited excessive alcohol consumption  
11  
12 96 (intake of alcohol exceeding 140 g/week for men and 70 g/week for women), 11 had  
13  
14 97 cancer, 5 were pregnant, 7 had type 1 diabetes, 25 had acute complications of  
15  
16 98 diabetes, 15 had acute cardiovascular events, 30 had severe hepatic and renal  
17  
18 99 insufficiency, 8 had viral liver disease, 30 had alcoholic liver disease, 5 had  
19  
20 100 drug-induced liver disease and 4 had autoimmune liver disease. Finally, 406  
21  
22 101 participants (230 men and 176 women) were included in this study. This study was a  
23  
24 102 retrospective study, so it was exempted from the requirement of informed consent and  
25  
26 103 was approved by the Ethics Committee of The First Affiliated Hospital of Anhui  
27  
28 104 University of Traditional Chinese Medicine.

### 105 **Data collection**

106 We collected data on sex, age, menopausal history of women, height, weight,  
107 diabetes course, preadmission hypoglycaemic plan (including metformin, insulin and  
108 other hypoglycaemic drugs such as sulfonylureas, glinides, thiazolidinediones,  
109  $\alpha$ -glucosidase inhibitors, glucagon-like peptide-1 receptor agonists, dipeptidyl  
110 peptidase 4 inhibitors, sodium-glucose cotransporter protein 2 inhibitors), history of  
111 alcohol consumption, occurrence of cancer, history of other liver diseases, waist  
112 circumference, hip circumference, and blood pressure. All patients' morning venous  
113 blood samples were collected on the second day after admission, and all blood was  
114 extracted with a centrifuge. After separation of serum, fasting blood glucose (FBG),  
115 blood fat, liver and kidney function were measured using an automatic biochemical  
116 analyser (7600-020; Hitachi). Fasting C-peptide (FCP) was examined using an  
117 enzyme-linked immunosorbent assay (A2000 Plus; Autolumo). An automated  
118 chemiluminescent immunoassay (Siemens Immulite 2000, UK) was used to measure  
119 PRL. The coefficients of intra-assay and interassay variation ranged from 2.49-3.47%  
120 and 2.91-3.14%, respectively. PRL levels are affected by many conditions including

Running title: Prolactin and fatty liver disease

121 the use of various drugs, stress, and exercise, so we took blood samples at 9: 00 am  
122 after the patients were admitted to the hospital on the first day and the next morning.  
123 We took 2 ml blood samples each time. The patients fasted and rested in a sitting  
124 position for 30 minutes, and then the average value of two blood pressure readings  
125 was taken. High-performance liquid chromatography was used to check glycosylated  
126 haemoglobin (HbA1c) (Variant II; Bio - Rad).

### 127 **Definitions, counts and groups**

128 The diagnosis of T2DM was based on the diagnostic criteria proposed by the  
129 World Health Organization (WHO) Diabetes Expert Committee in 1999. The  
130 physiological level of PRL is based on the normal reference range of our hospital,  
131 which is 2.78-29.20 ng/mL for premenopausal women, 1.79-20.28 ng/mL for  
132 menopausal women and 2.12-17.69 ng/mL for men.

133 NAFLD was diagnosed by ultrasound[13] by a senior technician. The ultrasonic  
134 diagnosis of fatty liver is as follows: near-field of liver permeate punctiform  
135 hyperecho, composition of the intrahepatic duct not clearly demonstrated by  
136 ultrasonography, and weak echo in the distal echo. Diagnosis of NAFLD is based on  
137 the following requirements: no history of alcohol consumption, no other types of liver  
138 diseases, and unexplained increase in serum alanine aminotransferase (ALT), aspartic  
139 acid aminotransferase (AST) or glutamyltransferase (GGT) over 6 months[14].

140 The diagnosis of MetS conformed to the standard put forward in the ninth edition  
141 of internal medicine in China [15], and the diagnostic standard included the following  
142 three or more items: ① central obesity and/or abdominal obesity: waist  
143 circumference is greater than 90 cm for men and 85 cm for women; ②  
144 hyperglycaemia: FBG > 6.1 mmol/L or 2-hour blood glucose >7.8 mmol/L and/or  
145 confirmation of diabetes diagnosis and treatment with hypoglycaemic therapy; ③  
146 Hypertension: blood pressure exceeding 130/85 mmHg and/or diagnosis of  
147 hypertension and treatment with antihypertensive therapy; ④ fasting triglyceride  
148 (TG) level exceeding 1.7 mmol/l; and ⑤ fasting high-density lipoprotein (HDL)  
149 Level below 1.04 mmol/l. Body mass index (BMI) was computed by dividing the  
150 body weight (kg) by the square of the height (m<sup>2</sup>). homeostasis model assessment of

Running title: Prolactin and fatty liver disease

insulin resistance (C-peptide) (HOMA-IR (CP)) was determined by FCP as a substitute for fasting insulin as follows:  $HOMA-IR (CP) = 1.5 + FBG (mmol/L) \times FCP (pmol/L) / 2800$ .  $HOMA-\beta (CP-DM) = 0.27 \times FCP (pmol/L) / (FBG (mmol/L) - 3.5)$ [16].

In conformity with ultrasonic diagnosis, patients with T2DM who met the inclusion criteria were segmented into the without NAFLD group (77 men, 66 women) and the with NAFLD group (153 men, 110 women).

### Patient and public involvement

Patients and the public were not involved in the design, conduction, reporting, or dissemination plans of our research.

### Statistical analysis

SPSS 21.0 statistical software was used for the data analysis, and the Kolmogorov–Smirnov normality test was performed for all data. The measured data with a normal distribution are represented as the mean  $\pm$  standard deviation (SD). Comparisons were conducted between two groups, and comparisons were performed using independent T tests. Measurement data with nonnormal distributions are expressed as medians (interquartile intervals). In this situation, two groups were compared by using the Mann - Whitney rank sum test. Categorical variables are shown as the number of cases, and the chi-square test was adopted to demonstrate the differences within two or more groups. Spearman correlation analysis compared the relationship between PRL levels and other variables. The relationships among PRL, NAFLD and MetS were analysed by logistic regression.  $P < 0.05$  or  $P < 0.01$  represented obvious significant differences.

## Results

### 1. Comparison of general findings and laboratory test targets in each group

The ultrasonic diagnostic rate of NAFLD was 263 cases (153 plus 110 cases) (64.8%) (Table 1). Men with NAFLD had a younger age and higher BMI, waist circumference, hip circumference, diastolic blood pressure (DBP), GGT, FBG, TG, total cholesterol (TC), low-density lipoprotein (LDL), HOMA-IR (CP), HbA1C, and MetS incidence. Women with NAFLD also had higher BMI, ALT, GGT, TG, HOMA-IR (CP), HbA1C, and MetS incidence. HDL and PRL were markedly reduced

Running title: Prolactin and fatty liver disease

181 in the patients with NAFLD than in those without NAFLD in both sexes (p<0.05 or  
 182 p<0.01). In terms of medication history, there was no significant difference between  
 183 the two groups of male and female patients in hypoglycaemic programs, which could  
 184 exclude the influence of hypoglycaemic drugs on the study.

185 Table 1 Comparison of general characteristics and biochemical indexes of each group

|                           | Men                |                    |         | Women              |                    |         |
|---------------------------|--------------------|--------------------|---------|--------------------|--------------------|---------|
|                           | T2DM without NAFLD | T2DM with NAFLD    | P value | T2DM without NAFLD | T2DM with NAFLD    | P value |
| N                         | 77                 | 153                |         | 66                 | 110                |         |
| Age(years)                | 63(54-63)          | 54(48-62)          | 0.000   | 65(57-71)          | 61(55-69)          | 0.077   |
| Metabolic syndrome(%)     | 64.9               | 85.6               | 0.000   | 59.100             | 80.000             | 0.003   |
| Menopause(%)              | NA                 | NA                 |         | 99.100             | 83.600             | 0.117   |
| Diabetes course(years)    | 10(3-15)           | 8(3-12)            | 0.280   | 10(5-20)           | 10(4-15)           | 0.070   |
| BMI(kg/m <sup>2</sup> )   | 24.90±2.97         | 27.18±2.94         | 0.000   | 24.54±3.35         | 26.33±3.55         | 0.000   |
| Systolic pressure(mmHg)   | 130(125-146)       | 132(121-145)       | 0.880   | 130(124-151)       | 130(123-144)       | 0.233   |
| Diastolic pressure(mmHg)  | 81.48±9.59         | 85.80±9.94         | 0.002   | 80.48±8.59         | 79.07±8.16         | 0.277   |
| Waist circumference(cm)   | 90.71±8.02         | 96.29±8.45         | 0.000   | 89.02±9.07         | 91.38±9.41         | 0.103   |
| Hip circumference(cm)     | 96.64±6.77         | 100.66±6.18        | 0.000   | 97.00±6.52         | 97.73±7.81         | 0.526   |
| ALT(U/L)                  | 19(13-28)          | 21(15-32)          | 0.082   | 15(12-21)          | 19(14-33)          | 0.000   |
| AST(U/L)                  | 18(15-23)          | 19(15-23)          | 0.881   | 17(15-20)          | 18(15-25)          | 0.094   |
| GGT (U/L)                 | 24(17-36)          | 35(23-56)          | 0.000   | 19(14-28)          | 25(19-35)          | 0.000   |
| FBG (mmol/L)              | 6.81(5.41-9.49)    | 7.80(6.21-11.0)    | 0.002   | 6.61(5.48-9.34)    | 7.89(6.05-10.96)   | 0.050   |
| TG (mmol/L)               | 1.20(0.79-1.75)    | 2.01(1.42-3.27)    | 0.000   | 1.23(0.93-1.50)    | 1.81(1.19-2.35)    | 0.000   |
| TC(mmol/L)                | 4.32±0.92          | 4.83±1.10          | 0.001   | 4.77±1.24          | 5.02±1.11          | 0.158   |
| HDL (mmol/L)              | 1.04(0.96-1.18)    | 0.97(0.82-1.11)    | 0.004   | 1.23(1.05-1.47)    | 1.10(0.99-1.28)    | 0.002   |
| LDL (mmol/L)              | 2.45±0.78          | 2.78±0.85          | 0.004   | 2.84±1.05          | 2.98±0.88          | 0.373   |
| HOMA-IR(CP)               | 2.90(2.46-3.97)    | 3.99(3.18-5.20)    | 0.000   | 2.97(2.54-3.68)    | 3.68(2.91-4.41)    | 0.001   |
| HOMA-β(CP-DM)             | 46.94(25.29-88.92) | 44.33(27.17-83.92) | 0.686   | 38.55(22.52-80.19) | 48.27(25.02-73.90) | 0.553   |
| HbA1C (%)                 | 7.5(6.7-9.1)       | 8.3(7.0-9.7)       | 0.043   | 7.7(6.7-9.3)       | 8.5(7.4-9.9)       | 0.020   |
| PRL(ng/mL)                | 10.36(9.35-14.72)  | 9.56(7.81-12.60)   | 0.001   | 12.97(10.03-16.58) | 10.38(8.43-14.27)  | 0.001   |
| Hypoglycaemic plan        |                    |                    |         |                    |                    |         |
| Metformin                 | 26(33.8%)          | 62(40.5%)          |         | 17(25.8%)          | 43(39.1%)          |         |
| Other hypoglycaemic drugs | 16(20.8%)          | 44(28.8%)          | 0.083   | 23(34.8%)          | 27(24.5%)          | 0.150   |
| Insulin                   | 35(45.4%)          | 47(30.7%)          |         | 26(39.4%)          | 40(36.4%)          |         |

186 Note: NAFLD, Nonalcoholic fatty liver disease; T2DM, Type 2 diabetes mellitus; BMI, Body mass index; ALT, Alanine aminotransferase; AST, Aspartic acid  
 187 aminotransferase; GGT, Glutamyltransferase; FBG, Fasting blood glucose; TG, Triglyceride; TC, Total cholesterol; HDL, High density lipoprotein; LDL, Low  
 188 density lipoprotein; HOMA-IR(CP), homeostasis model assessment for insulin resistance(C-peptide); HOMA-β(CP-DM): homeostasis model assessment for

## Running title: Prolactin and fatty liver disease

189 beta(C-peptide- diabetes mellitus);HbA1c, Glycosylated haemoglobin; PRL, prolactin. The measured data with a normal distribution are represented as the  
 190 mean±SD. Measurement data for nonnormal distributions are expressed as medians (interquartile intervals).Normally distributed variables: BMI, diastolic  
 191 blood pressure, waist circumference, hip circumference, TC, LDL; Nonnormally distributed variables: Age, diabetes course, systolic blood pressure, ALT, AST,  
 192 GGT, FBG, TG, HDL, HOMA-IR (CP), HOMA-β (CP-DM), HbA1C, and PRL.

193 Because women's serum PRL is affected by menopause, we analysed the  
 194 metabolic status and PRL levels of female patients with or without NAFLD before  
 195 and after menopause (Table 2). Premenopausal women with NAFLD had higher BMI,  
 196 FBG, TG, HbA1C and MetS incidence. Postmenopausal women with NAFLD had  
 197 higher BMI, ALT, GGT, TG, HOMA-IR (CP) and MetS incidence, while HDL and  
 198 PRL were markedly reduced in the patients with NAFLD compared with the levels in  
 199 those without NAFLD ( $p<0.05$  or  $p<0.01$ ).

200 Table 2 Comparison of clinical data of women with and without NAFLD before and  
 201 after menopause

|                          | Premenopause          |                    |            | Postmenopause         |                    |            |
|--------------------------|-----------------------|--------------------|------------|-----------------------|--------------------|------------|
|                          | T2DM without<br>NAFLD | T2DM with<br>NAFLD | P<br>value | T2DM without<br>NAFLD | T2DM with<br>NAFLD | P<br>value |
| N                        | 6                     | 18                 |            | 60                    | 92                 |            |
| Age(years)               | 44.80±3.76            | 45.20±4.37         | 0.848      | 66.15±8.34            | 64.61±8.16         | 0.261      |
| Metabolic syndrome(%)    | 0                     | 77.8               | 0.001      | 65                    | 80.4               | 0.033      |
| Diabetes course(years)   | 8.180±6.69            | 4.78±4.12          | 0.149      | 12.86±9.02            | 10.69±6.88         | 0.116      |
| BMI(kg/m <sup>2</sup> )  | 22.80±3.87            | 26.70±3.43         | 0.029      | 24.71±3.28            | 26.26±3.59         | 0.008      |
| Systolic pressure(mmHg)  | 121.83±7.08           | 128.50±8.78        | 0.107      | 133(127-152)          | 131(122-145)       | 0.167      |
| Diastolic pressure(mmHg) | 77.50±7.18            | 84.06±6.78         | 0.055      | 80.78±8.71            | 78.10±8.08         | 0.054      |
| Waist circumference(cm)  | 80.33±12.36           | 89.06±7.92         | 0.055      | 89.88±8.32            | 91.84±9.65         | 0.200      |
| Hip circumference(cm)    | 94.67±6.83            | 95.61±7.65         | 0.791      | 97.23±6.50            | 98.14±7.81         | 0.456      |
| ALT(U/L)                 | 13(11-16)             | 15(13-45)          | 0.121      | 15(12-22)             | 20(15-33)          | 0.000      |
| AST(U/L)                 | 16(15-18)             | 16(13-35)          | 1.000      | 17(15-20)             | 19(16-25)          | 0.073      |
| GGT (U/L)                | 20.67±14.28           | 37.67±31.34        | 0.217      | 19(14-29)             | 26(18-35)          | 0.002      |
| FBG (mmol/L)             | 6.61±1.59             | 10.99±3.10         | 0.003      | 7.81±2.97             | 8.08±2.78          | 0.566      |
| TG (mmol/L)              | 1.09(0.63-1.30)       | 2.02(1.37-2.83)    | 0.003      | 1.24(0.93-1.56)       | 1.74(1.17-2.34)    | 0.000      |
| TC(mmol/L)               | 4.77±0.84             | 5.16±1.46          | 0.534      | 4.77±1.28             | 4.99±1.04          | 0.229      |
| HDL (mmol/L)             | 1.23±0.17             | 1.06±0.21          | 0.086      | 1.27±0.29             | 1.14±0.27          | 0.005      |
| LDL (mmol/L)             | 2.92±0.83             | 2.84±0.86          | 0.838      | 2.84±1.08             | 3.00±0.89          | 0.301      |
| HOMA-IR(CP)              | 2.30±0.57             | 4.87±2.98          | 0.051      | 3.28±1.00             | 3.73±1.43          | 0.036      |
| HOMA-β(CP-DM)            | 25.07(19.86-28.67)    | 25.99(13.78-56.47) | 0.689      | 47.00(22.63-85.05)    | 51.60(28.83-75.27) | 0.505      |
| HbA1C (%)                | 7.62±0.89             | 9.53±1.66          | 0.014      | 8.16±1.82             | 8.53±1.67          | 0.196      |



## Running title: Prolactin and fatty liver disease

PRL(ng/mL) 18.92±8.57 14.54±4.64 0.122 13.16±3.79 10.88±3.77 0.000

202 Note: NAFLD, Nonalcoholic fatty liver disease; T2DM, Type 2 diabetes mellitus; BMI, Body mass index; ALT, Alanine aminotransferase; AST, Aspartic acid  
 203 aminotransferase; GGT, Glutamyltransferase; FBG, Fasting blood glucose; TG, Triglyceride; TC, Total cholesterol; HDL, High density lipoprotein; LDL, Low  
 204 density lipoprotein; HOMA-IR(CP), homeostasis model assessment for insulin resistance(C-peptide); HOMA-β(CP-DM): homeostasis model assessment for  
 205 beta(C-peptide- diabetes mellitus);HbA1c, Glycosylated haemoglobin; PRL, prolactin. The measurement data with a normal distribution are represented as the  
 206 mean±SD. Measurement data with nonnormal distributions are expressed as medians (interquartile intervals).<sup>1</sup>

## 207 2. Relationship between PRL levels and MetS-related parameters

208 We further investigated the relationship between PRL levels and MetS-related  
 209 parameters (Table 3). We found that in male subjects, the levels of PRL were  
 210 negatively correlated with hip circumference, TG and HOMA-IR (CP) and positively  
 211 associated with HDL. In female subjects, PRL levels were negatively correlated with  
 212 BMI, DBP, waist circumference,

213 Table3 Relationship between PRL levels and MetS-related parameters

|                     | Men    |         | Women  |         |
|---------------------|--------|---------|--------|---------|
|                     | r      | P value | r      | P value |
| BMI                 | -0.092 | 0.166   | -0.192 | 0.011   |
| Systolic pressure   | 0.046  | 0.492   | -0.045 | 0.552   |
| Diastolic pressure  | -0.125 | 0.059   | -0.220 | 0.003   |
| Waist circumference | -0.056 | 0.398   | -0.152 | 0.044   |
| Hip circumference   | -0.141 | 0.032   | -0.157 | 0.037   |
| FBG                 | -0.109 | 0.098   | -0.034 | 0.654   |
| TG                  | -0.252 | 0.000   | -0.258 | 0.001   |
| TC                  | -0.096 | 0.146   | -0.061 | 0.421   |
| HDL                 | 0.147  | 0.025   | 0.065  | 0.390   |
| LDL                 | -0.042 | 0.528   | -0.110 | 0.146   |
| HOMA-IR(CP)         | -0.141 | 0.032   | -0.049 | 0.519   |
| HOMA-β(CP-DM)       | 0.019  | 0.772   | -0.044 | 0.562   |
| HbA1C               | -0.091 | 0.168   | 0.057  | 0.450   |

214 Note: Met S, metabolic syndrome; BMI, body mass index; FBG, fasting blood glucose; TG, triglyceride; TC, total cholesterol; HDL, high-density  
 215 lipoprotein; LDL, low-density lipoprotein; HOMA-IR (CP), homeostasis model assessment for insulin resistance (C-peptide); HOMA-β (CP-DM): homeostasis  
 216 model assessment for beta (C-peptide-diabetes mellitus); HbA1c, glycosylated haemoglobin; PRL, prolactin.; PRL, prolactin.

## 217 3. Multiple-factor logistic regression analysis of serum PRL levels and NAFLD 218 risk

219

Running title: Prolactin and fatty liver disease

220 The impact index for NAFLD was assessed using multiple logistic regression  
 221 analysis, which included age, BMI, menopause, TG, LDL, HOMA-IR (CP), HbA1C  
 222 and PRL as variables. We found that PRL levels were independently negatively  
 223 associated with NAFLD in both men and women (odds ratio (OR): 0.891, 95%  
 224 confidence interval (CI): 0.803-0.989,  $p=0.031$ , for men; OR: 0.874, 95% (CI):  
 225 0.797-0.957,  $p=0.004$ , for women). Other risk factors included age, BMI, LDL and  
 226 HOMA-IR (CP) for men and TG for women (Table 4).

227 Table 4 Multivariate logistic regression analysis of serum PRL levels and NAFLD  
 228 risk

|             | Men     |                    |         | Women   |                    |         |
|-------------|---------|--------------------|---------|---------|--------------------|---------|
|             | $\beta$ | OR(95% CI)         | p value | $\beta$ | OR(95% CI)         | p value |
| Age         | -0.045  | 0.956(0.924-0.989) | 0.010   | -0.044  | 0.957(0.912-1.004) | 0.070   |
| BMI         | 0.255   | 1.291(1.122-1.484) | 0.000   | 0.090   | 1.094(0.97-1.224)  | 0.120   |
| Menopause   |         |                    |         | 0.213   | 1.237(0.281-5.441) | 0.778   |
| TG          | 0.176   | 1.193(0.959-1.483) | 0.113   | 0.981   | 2.666(1.404-5.064) | 0.003   |
| LDL         | 0.493   | 1.637(1.046-2.561) | 0.031   | -0.121  | 0.886(0.596-1.318) | 0.550   |
| HOMA-IR(CP) | 0.360   | 1.134(1.062-1.936) | 0.019   | 0.215   | 1.240(0.859-1.788) | 0.250   |
| HbA1C       | 0.057   | 1.059(0.872-1.287) | 0.564   | 0.047   | 1.048(0.840-1.308) | 0.676   |
| PRL         | -0.115  | 0.891(0.803-0.989) | 0.031   | -0.135  | 0.874(0.797-0.957) | 0.004   |

229 Note: The risk factors for NAFLD were assessed using multiple logistic regression analysis in men and women. The ORs with corresponding 95% CIs were  
 230 adjusted for age, BMI, menopause, TG, LDL and HOMA-IR (CP), HbA1C and PRL levels as variables. NAFLD, nonalcoholic fatty liver disease; BMI, body mass  
 231 index; FBG, fasting blood glucose; TG, triglyceride; LDL, low-density lipoprotein; HOMA-IR (CP), homeostasis model assessment for insulin resistance  
 232 (C-peptide); HbA1c, glycosylated haemoglobin; PRL, prolactin.; PRL, prolactin. OR: Odds ratio; CI: Confidence interval

#### 233 4. Relationship between PRL levels and the prevalence of NAFLD and MetS

234 According to the quartiles of PRL levels, the subjects were divided into four  
 235 groups: T1 < 8.29 (n = 57 cases), 8.29 ≤ T2 < 9.93 (n = 58 cases), 9.93 ≤ T3 < 12.68 (n = 57  
 236 cases), T4 ≥ 12.68 (n = 58 cases) ng/mL in men (n = 230 cases) and T1 < 8.95 (n = 44  
 237 cases), 8.95 ≤ T2 < 11.32 (n = 44 cases), 11.32 ≤ T3 < 14.95 (n = 44 cases), T4 ≥ 14.95 (n =  
 238 44 cases) ng/mL in women (n = 176 cases). The chi-square test was used to compare  
 239 the prevalence and composition ratio among different groups. The prevalence of  
 240 NAFLD exhibited a decreasing trend with the rise of the quartile of PRL in both sexes  
 241 (T1: 84.2%, T2: 63.8%, T3: 59.6%, T4: 58.6%,  $p=0.012$  in men; T1: 79.5%, T2:  
 242 65.9%, T3: 54.5%, T4: 50%,  $p=0.013$  in women). However, the prevalence rates of  
 243 MetS were T1: 86%, T2: 79.3%, T3: 77.2%, T4: 72.4% ( $p=0.354$ ) in men and T1:



Running title: Prolactin and fatty liver disease

84.1%, T2: 70.5%, T3: 77.3%, T4: 56.8% (p= 0.031) in women. Therefore, in female subjects, the prevalence rate of Met S in the fourth quartile of PRL was significantly lower than those in the first, second and third quartiles

## Discussion

At present, due to the rapid increase in the incidence of obesity and obesity-related diseases, NAFLD has become an important public health problem[17]. NAFLD is considered the manifestation of MetS in the liver, especially in patients with T2DM[18]. In this study, it was found that the incidence of NAFLD diagnosed by abdominal liver colour Doppler ultrasound was 64.8%. Compared with non-NAFLD patients, NAFLD patients had higher BMI, TG, GGT, HOMA-IR (CP), HbA1C, and MetS incidence and lower HDL in both sexes. Zhang et al[19] obtained similar results. BMI, TG and HDL are components of MetS. Therefore, T2DM complicated with NAFLD promotes abnormalities in metabolic indexes.

PRL is a hormone closely related to metabolism[20]. Recent findings have shown that there is a close association between PRL and T2DM. A cross-sectional study included 2377 adults from the community population (excluding those with hyperprolactinemia) and found that individuals with impaired glucose regulation and T2DM had lower PRL levels. Researchers controlled for age, sex, BMI and other confounding factors and still discovered that the risk in the abovementioned people with high serum PRL was significantly reduced [11]. Further follow-up of 3.7 years revealed that female patients had a lower risk of T2DM in the highest quartile of PRL, with a risk ratio of 0.48[9]. Another cross-sectional study also found that the risk of MetS and T2DM in women with lower baseline PRL were increased[21]. A large meta-analysis indicated that higher serum PRL levels in the normal range were related to a low risk of T2DM[22]. Jha et al[23] also found that serum PRL had a significant correlation with liver disease and predicted mortality. In adipose tissue, PRL intervention can reduce the production of malonyl coenzyme A in human primary adipocytes, thus inhibiting triglyceride synthesis[24]. The PRL receptor can also directly inhibit the expression of fatty acid synthetase and fatty acid synthesis in 3T3L1 cells[25]. PRL reduced the accumulation of triglycerides in the liver through

Running title: Prolactin and fatty liver disease

274 the PRL receptor, thus improving liver steatosis [10]. These results indicate that  
275 higher PRL levels had a positive protective effect on glucose and lipid metabolism.

276 Considering that PRL secretion may differ according to sex, we studied male and  
277 female subjects separately. We found that compared with non-NAFLD patients, the  
278 PRL value of NAFLD patients was lower in both sexes. Age, BMI, TG, LDL,  
279 HOMA-IR (CP), and HbA1C were adjusted; additionally, among female subjects,  
280 menopausal factors were adjusted, and the study suggested that PRL levels had a  
281 negative relationship with the risk of NAFLD. In line with the quartile of PRL, the  
282 incidence of NAFLD showed a general decrease with the increase in PRL levels in  
283 both sexes. Zhang et al[26] noted that when PRL increased by one standard deviation  
284 the risk among male NAFLD patients decreased by 12.3%, and that among female  
285 patients decreased by 21.4%. PRL was proven to be a protective factor, that affected  
286 the existence and progression of NAFLD. In another study, Zhang et al[19] also found  
287 that the PRL levels of NAFLD patients diagnosed by ultrasound were significantly  
288 lower than those of non-NAFLD patients, whether male or female. In addition, with  
289 the increase in PRL quartile, the incidence of NAFLD decreased. All analyses were  
290 corrected for age, sex, BMI, insulin resistance, HbA1C, diabetes and other factors.  
291 The results showed that PRL an inverse association with NAFLD. We took into  
292 consideration that PRL levels are affected by many conditions including, various  
293 drugs, stress, and exercise. We ruled out the following cases: the use of drugs that  
294 affect PRL (metoclopramide, methyl-dopa, opiates, and cimetidine) and levels of  
295 thyroid-stimulating hormone, cortisol, oestradiol and testosterone that were higher  
296 than the normal range. In terms of medication history, there was no significant  
297 difference between the two groups of male and female patients in regard to  
298 hypoglycaemic programs, which could exclude the influence of hypoglycaemic drugs  
299 on the study.

300 In addition, the secretion of PRL may be affected by menopausal status. This paper  
301 analysed menopausal and nonmenopausal women and found that postmenopausal  
302 women with NAFLD had lower PRL levels. In addition, Zhang Zhuzi et al[27]  
303 divided the included women into a premenopausal group and a postmenopausal group

Running title: Prolactin and fatty liver disease

304 and found that in both groups, the PRL of patients with NAFLD was lower than that  
305 of patients without NAFLD, and the decrease in PRL levels in postmenopausal  
306 women with NAFLD was more significant. It was suggested that the decrease in the  
307 PRL of patients with NAFLD was affected by menopausal factors.

308 Studies have shown a correlation between PRL levels and the components of  
309 Met S, which could explain the role of PRL in NAFLD. According to basic studies, in  
310 an obese mouse model induced by a high-fat diet, severe metabolic changes would  
311 occur in mice with PRL receptor failure. Injection of PRL could improve insulin  
312 sensitivity and prevent visceral adipocyte hypertrophy [28]. Clinical studies have  
313 found that low serum PRL levels in the physiological range are related to poor  
314 metabolic outcomes of MetS and T2DM[11]. In overweight and obese men, serum  
315 PRL levels were lower [28]. Friedrich et al[29] found that PRL levels were negatively  
316 correlated with waist circumference in 1857 healthy women aged 20-79 years. The  
317 endocrine characteristics of MetS and polycystic ovary syndrome (PCOS) have a  
318 relatively high similarity rate [30]. A systematic retrospective analysis of 2052 PCOS  
319 patients revealed that the lower the serum PRL was, the higher the BMI. PRL had the  
320 opposite relationship with TG, TC and LDL-C [31]. Arterial hypertension is a  
321 component of MetS. A prospective study of 874 postmenopausal women found that  
322 PRL levels increased by 1 standard deviation during 8 years of follow-up, and the  
323 relative risk of hypertension was 1.31[32]. Our study found that in male subjects, the  
324 levels of PRL were negatively correlated with hip circumference, TG and HOMA-IR  
325 (CP) and positively associated with HDL. In female subjects, PRL levels were  
326 negatively correlated with BMI, DBP, waist circumference, hip circumference, and  
327 TG. In female subjects, the prevalence rates of MetS in the fourth quartile of PRL  
328 were significantly lower than those in the first, second and third quartiles.  
329 Furthermore, premenopausal and postmenopausal women with NAFLD had higher  
330 BMI, TG and MetS incidence. NAFLD is very common in obese and dyslipidaemic  
331 patients. Obese individuals produce relatively excessive proinflammatory factors,  
332 some of which inhibit the treatment of liver fat and promote the accumulation of  
333 lipids in hepatocytes [33]. Dyslipidaemia, especially hypertriglyceridaemia, may

Running title: Prolactin and fatty liver disease

334 subsequently increase the transportation of TG and other fats into hepatocytes,  
335 resulting in hepatic steatosis [34].

336 As a retrospective analysis, this study has many limitations. First, the diagnosis  
337 of NAFLD was based on ultrasound examination, which cannot distinguish NASH  
338 from fibrosis. Second, because this was a cross-sectional study, we cannot infer the  
339 direct cause and effect relationship between PRL and NAFLD and need further  
340 mechanical studies to clarify the exact relationship. Third, PRL secretion appears in  
341 pulse form, the best time to draw blood for PRL is from 9:00 to 11:00 a.m., and  
342 patients should avoid emotional excitement around this time. Finally, due to the  
343 limited number of participants in this study, the effects of drugs for treating  
344 cardiovascular diseases and controlling blood lipids on PRL levels have not been  
345 investigated, which requires further layered analysis in future work. Moreover, the  
346 small sample size cannot replace a large-scale population-based cross-sectional  
347 epidemiological study, so it is necessary to increase the sample size.

### 348 **Conclusions**

349 In summary, our research shows that serum PRL levels are related to NAFLD in  
350 the T2DM population in the physiological range and are also connected to known  
351 metabolic indicators. Our research results may help to predict the risk of developing  
352 NAFLD to better understand the disease and to formulate effective prevention  
353 strategies.

### 354 **Abbreviations**

355 NAFLD: nonalcoholic fatty liver disease; T2DM: type 2 diabetes mellitus; PRL: prolactin;  
356 Met S: metabolic syndrome; NASH: nonalcoholic steatohepatitis; SBP: systolic pressure;  
357 DBP: diastolic pressure; BMI: body mass index; AST: aspartic acid aminotransferase; ALT:  
358 alanine aminotransferase; GGT: glutamyltransferase; FBG: fasting blood glucose; TG:  
359 triglyceride; TC: total cholesterol; HDL: high-density lipoprotein; LDL: low-density lipoprotein;  
360 HOMA-IR (CP): Modified homeostasis model assessment for insulin resistance (C-peptide);  
361 HOMA- $\beta$  (CP-DM): homeostasis model assessment for beta (C-peptide-diabetes mellitus);  
362 HbA1c: glycosylated haemoglobin; SD: standard deviation; OR: odds ratio; CI: confidence  
363 interval

### 364 **Footnotes**

### 365 **Contributorship statement**

366 YZ conceived the study, collected clinical data, analysed and interpreted the data

1 Running title: Prolactin and fatty liver disease

2  
3  
4 367 and wrote the manuscript. HL made a revised version. All authors read and agreed to  
5  
6 368 the final version of the manuscript.

### 7 369 **Competing interests**

8  
9 370 The authors declare that they have no competing interests.

### 11 12 371 **Funding**

13  
14  
15  
16 372 This work was supported by priority natural project of Anhui University of Chinese  
17  
18 373 Medicine (2020yfyzc22). The funding bodies played no role in the design of the  
19  
20 374 study; the collection, analysis, and interpretation of data; or in writing the manuscript.

### 21 375 **Data availability statement**

22  
23  
24 376 The data that support this study are available from the corresponding author upon  
25  
26 377 reasonable request.

### 27 378 **Ethics approval and consent to participate**

28  
29 379 This study was a retrospective study, so it was exempted from the requirement of  
30  
31 380 informed consent and the approval of the Ethics Committee of The First Affiliated  
32  
33 381 Hospital of Anhui University of Traditional Chinese Medicine (2020MCZQ09).

### 34 382 **References**

- 35  
36  
37 383 [1]Anstee QM, Targher G, Day CP (2013) Progression of NAFLD to diabetes  
38  
39 384 mellitus, cardiovascular disease or cirrhosis. *Nat Rev Gastroenterol Hepatol*  
40  
41 385 10:330-344.
- 42  
43 386 [2]Wan FS, Fan JG, Zhang Z, Gao B, Wang HY (2014) The global burden of liver  
44  
45 387 disease: the major impact of China. *Hepatology* 60: 2099-2108.
- 46  
47 388 [3]Younossi ZM, Koenig AB, Abdelatif D, Fazel Y, Henry L, et al. (2016) Global  
48  
49 389 epidemiology of nonalcoholic fatty liver disease. Meta-analytic assessment of  
50  
51 390 prevalence, incidence and outcomes. *Hepatology* 64: 73-84.
- 52  
53 391 [4]Mantovani A, Turino T, Lando MG, Gjini K, Byrne CD, et al. (2020) Screening for  
54  
55 392 non-alcoholic fatty liver disease using liver stiffness measurement and its association  
56  
57 393 with chronic kidney disease and cardiovascular complications in patients with type 2  
58  
59 394 diabetes. *Diabetes Metab* 46: 296-303.
- 60

Running title: Prolactin and fatty liver disease

- 1  
2  
3  
4 395 [5] Riella ME (2015) Nonalcoholic fatty liver disease: a systematic review. *Jama* 313  
5 : 2263-2273.  
6  
7  
8 397 [6] Pappachan JM, Babu S, Krishnan B, Ravindran NC (2017) Non-alcoholic Fatty  
9  
10 398 Liver Disease: A Clinical Update. *J Clin Transl Hepatol* 28: 384-393.  
11  
12 399 [7] Goffin V, Binart N, Touraine P, et al. (2002) Prolactin: the new biology of an old  
13  
14 400 hormone. *Annu Rev Physiol* 64: 47-67.  
15  
16 401 [8] Yip SH, Romanò N, Gustafson P, Kelly PA (2019) Elevated prolactin during  
17  
18 402 pregnancy drives a phenotypic switch in mouse hypothalamic dopaminergic  
19  
20 403 neurons. *Cell Rep* 26: 1787 - 1799.  
21  
22 404 [9] Wang T, Xu Y, Xu M, Ning G, Lu J, et al. (2016) Circulating prolactin and risk of  
23  
24 405 type 2 diabetes: A prospective study. *Am J Epidemiol* 184: 295 - 301.  
25  
26 406 [10] Shao SS, Yao ZY, Lu JY, Song YF, He Z, et al. (2018) Ablation of prolactin  
27  
28 407 receptor increases hepatic triglyceride accumulation. *Biochem Biophys Res*  
29  
30 408 *Commun* 498: 693 - 699.  
31  
32 409 [11] Wang TG, Lu JL, Xu Y, Li M, Sun JC, et al. (2013) Circulating prolactin  
33  
34 410 associates with diabetes and impaired glucose regulation: a population-based study.  
35  
36 411 *Diabetes Care* 36: 1974-1980.  
37  
38 412 [12] Manshaei N, Shakibaei F, Fazilati M, Salavatia H, Negahdary M, et al. (2019) An  
39  
40 413 investigation of the association between the level of prolactin in serum and type II  
41  
42 414 diabetes. *Diabetes & Metabolic Syndrome* 13: 3035-3041.  
43  
44 415 [13] Fan JG, Farrell GC (2009) Epidemiology of non-alcoholic fatty liver disease in  
45  
46 416 China. *J Hepatol* 50: 204-210.  
47  
48 417 [14] Fatty liver and alcoholic liver disease group of hepatology branch of Chinese  
49  
50 418 medical association, expert committee of fatty liver disease of Chinese medical doctor  
51  
52 419 association (2018) Guidelines for prevention and treatment of nonalcoholic fatty liver  
53  
54 420 disease (updated in 2018). *J Practical Liver Diseases* 21: 177-186.  
55  
56 421 [15] Ge JB, Xu YJ, Wang C (2019) *Internal Medicine (Ninth Edition)*. Beijing People's  
57  
58 422 Medical Publishing House 942.  
59  
60 423 [16] Li X, Zhou ZG, Qi HY, Chen XY, Huang G (2004) Evaluation of insulin resistance



Running title: Prolactin and fatty liver disease

424 and islet  $\beta$  cell function by using fasting C peptide instead of insulin to improve Homa  
425 formula. *J Cent South Univ* 29:419-423.

426 [17]Huang H, Lee SH, Lima IS, Kim SS, Hwang WM, et al. (2018) Rho-kinase/  
427 AMPK axis regulates hepatic lipogenesis during overnutrition. *J Clin Invest* 128:  
428 5335 – 5350.

429 [18]Rhee EJ (2019) Nonalcoholic fatty liver disease and diabetes: an epidemiological  
430 perspective. *Endocrinol Metab* 34:226-233.

431 [19]Zhang PZ, Ge ZJ, Wang HD, Feng WH, Sun XT, et al. (2018) Prolactin improves  
432 hepatic steatosis via CD36 pathway. *J Hepatol* 68: 1247-1255.

433 [20]Jonathan NB, Hugo ER, Brandebourg TD, Lapensee CR (2006) Focus on  
434 prolactin as metabolic hormone. *Trends Endocrinol Metab* 17: 110-116.

435 [21]Chirico V, Cannavo S, Lacquaniti A, Salpietro V, Mandolino M, et al. (2013)  
436 Prolactin in obese children: a bridge between inflammation and metabolic-endocrine  
437 dysfunction. *Clin Endocrinol* 79: 537-544.

438 [22]Faria de Castro L, Alves dos Santos A, Augusto Casulari L, Anselmi Naves L,  
439 Amorim Amato A, et al. (2020) Association between variations of physiological  
440 prolactin serum levels and the risk of type 2 diabetes: a systematic review and  
441 meta-analysis. *Diabetes Res Clin Pract* 166: 1-26.

442 [23]Jha SK, Kannan S (2016) Serum prolactin in patients with liver disease in  
443 comparison with healthy adults: A preliminary cross-sectional study. *Int J Appl Basic*  
444 *Med Res* 6: 1-3.

445 [24]Nilsson LA, Roepstoff C, Kiens B, Billig H, Billig H, Ling C (2009) Prolactin  
446 suppresses malonyl-CoA concentration in human adipose tissue. *Horm Metab*  
447 *Res* 41:747-751.

448 [25]Hogan JC, Stephens JM (2005) The regulation of fatty acid synthase by STAT5A.  
449 *Diabetes* 54: 1968-1975.

450 [26]Zhang PZ, Ge ZJ, Wang HD, Feng WH, Jiang C, et al. (2018) Relationship  
451 between serum prolactin level and nonalcoholic fatty liver disease in overweight and  
452 obese patients. *Chin J Diabetes* 10: 186-192.

453 [27]Zhang PZ, Ge ZJ, Wang HD, Feng WH, Jiang C, et al. (2018) Relationship

Running title: Prolactin and fatty liver disease

454 between serum prolactin level and nonalcoholic fatty liver disease in overweight and  
455 obese patients. *Chin J Diabetes* 10: 186-192.

456 [28] Ruiz-Herrera XB, de los R' ıos EA, D' ıaz JM, Lerma-Alvarado RM, de la Escalera  
457 LM, et al. (2017) Prolactin Promotes Adipose Tissue Fitness and Insulin Sensitivity in  
458 Obese Males. *Endocrinol* 158: 56-68.

459 [29] Friedrich N, Schneider HJ, Spielhagen C, Markus MR, Haring R, et al. (2011) The  
460 association of serum prolactin concentration with inflammatory biomarkers-cross  
461 -sectional findings from the population-based Study of Health in Pomerania. *Clin*  
462 *Endocrinol* 4: 561-566.

463 [30] Rimmer M, Tan BK, Teede H, Thangaratinam HTS, Wattar BH (2019) Metabolic  
464 inflexibility in women with polycystic ovary syndrome: a systematic review. *Gynecol*  
465 *Endocrinol* 36: 501-507.

466 [31] Yang HY, Di JB, Pan JX, Yu R, Teng YL, et al. (2020) The Association Between  
467 Prolactin and Metabolic Parameters in PCOS Women: A Retrospective Analysis.  
468 *Frontiers in Endocrinology* 11: 263-271.

469 [32] Zhang L, Curhan GC, Forman JP (2010) Plasma prolactin level and risk of  
470 incident hypertension in postmenopausal women. *J Hypertens* 7: 1400 - 1405.

471 [33] Choi S, Diehl AM (2005) Role of inflammation in nonalcoholic steatohepatitis.  
472 *Curr Opin Gastroenterol* 21: 702 - 707.

473 [34] Abram CL, Lowell CA (2009) The ins and outs of leukocyte integrin signaling.  
474 *Annu Rev Immunol* 27: 339 - 362.



STROBE Statement—Checklist of items that should be included in reports of *cross-sectional studies*

| Section/Topic             | Item | Recommendation                                                                                                                                                                                    | Reported on page |
|---------------------------|------|---------------------------------------------------------------------------------------------------------------------------------------------------------------------------------------------------|------------------|
| Title and abstract        | 1    | (a) Indicate the study's design with a commonly used term in the title or the abstract                                                                                                            | 1, 2             |
|                           |      | (b) Provide in the abstract an informative and balanced summary of what was done and what was found                                                                                               | 2                |
| <b>Introduction</b>       |      |                                                                                                                                                                                                   |                  |
| Background/rationale      | 2    | Explain the scientific background and rationale for the investigation being reported                                                                                                              | 3                |
| Objectives                | 3    | State specific objectives, including any prespecified hypotheses                                                                                                                                  | 3                |
| <b>Methods</b>            |      |                                                                                                                                                                                                   |                  |
| Study design              | 4    | Present key elements of study design early in the paper                                                                                                                                           | 3–4              |
| Setting                   | 5    | Describe the setting, locations, and relevant dates, including periods of recruitment, exposure, follow-up, and data collection                                                                   | 4                |
| Participants              | 6    | (a) Describe the setting, locations, and relevant dates, including periods of recruitment, exposure, follow-up, and data collection                                                               | 4                |
| Variables                 | 7    | Clearly define all outcomes, exposures, predictors, potential confounders, and effect modifiers. Give diagnostic criteria, if applicable                                                          | 4–6              |
| Data sources/ measurement | 8*   | For each variable of interest, give sources of data and details of methods of assessment (measurement). Describe comparability of assessment methods if there is more than one group              | 4–5              |
| Bias                      | 9    | Describe any efforts to address potential sources of bias                                                                                                                                         | n/a              |
| Study size                | 10   | Explain how the study size was arrived at                                                                                                                                                         | 3–4              |
| Quantitative variables    | 11   | Explain how quantitative variables were handled in the analyses. If applicable, describe which groupings were chosen and why                                                                      | 6                |
| Statistical methods       | 12   | (a) Describe all statistical methods, including those used to control for confounding                                                                                                             | 6                |
|                           |      | (b) Describe any methods used to examine subgroups and interactions                                                                                                                               | 6                |
|                           |      | (c) Explain how missing data were addressed                                                                                                                                                       | n/a              |
|                           |      | (d) If applicable, describe analytical methods taking account of sampling strategy                                                                                                                | n/a              |
|                           |      | (e) Describe any sensitivity analyses                                                                                                                                                             | n/a              |
| <b>Results</b>            |      |                                                                                                                                                                                                   |                  |
| Participants              | 13*  | (a) Report numbers of individuals at each stage of study—eg numbers potentially eligible, examined for eligibility, confirmed eligible, included in the study, completing follow-up, and analysed | n/a              |
|                           |      | (b) Give reasons for non-participation at each stage                                                                                                                                              | n/a              |
|                           |      | (c) Consider use of a flow diagram                                                                                                                                                                | n/a              |

|                          |     |                                                                                                                                                                                                              |       |
|--------------------------|-----|--------------------------------------------------------------------------------------------------------------------------------------------------------------------------------------------------------------|-------|
| Descriptive data         | 14* | (a) Give characteristics of study participants (eg demographic, clinical, social) and information on exposures and potential confounders                                                                     | n/a   |
|                          |     | (b) Indicate number of participants with missing data for each variable of interest                                                                                                                          | n/a   |
| Outcome data             | 15* | Report numbers of outcome events or summary measures                                                                                                                                                         | 6–11  |
| Main results             | 16  | (a) Give unadjusted estimates and, if applicable, confounder-adjusted estimates and their precision (eg, 95% confidence interval). Make clear which confounders were adjusted for and why they were included | 6–11  |
|                          |     | (b) Report category boundaries when continuous variables were categorized                                                                                                                                    | n/a   |
|                          |     | (c) If relevant, consider translating estimates of relative risk into absolute risk for a meaningful time period                                                                                             | n/a   |
| Other analyses           | 17  | Report other analyses done—eg analyses of subgroups and interactions, and sensitivity analyses                                                                                                               | 6–11  |
| <b>Discussion</b>        |     |                                                                                                                                                                                                              |       |
| Key results              | 18  | Summarise key results with reference to study objectives                                                                                                                                                     | 11–13 |
| Limitations              | 19  | Discuss limitations of the study, taking into account sources of potential bias or imprecision. Discuss both direction and magnitude of any potential bias                                                   | 14    |
| Interpretation           | 20  | Give a cautious overall interpretation of results considering objectives, limitations, multiplicity of analyses, results from similar studies, and other relevant evidence                                   | 13–14 |
| Generalisability         | 21  | Discuss the generalisability (external validity) of the study results                                                                                                                                        | 14    |
| <b>Other information</b> |     |                                                                                                                                                                                                              |       |
| Funding                  | 22  | Give the source of funding and the role of the funders for the present study and, if applicable, for the original study on which the present article is based                                                | 15    |

\*Give information separately for exposed and unexposed groups.

**Note:** An Explanation and Elaboration article discusses each checklist item and gives methodological background and published examples of transparent reporting. The STROBE checklist is best used in conjunction with this article (freely available on the Web sites of PLoS Medicine at <http://www.plosmedicine.org/>, Annals of Internal Medicine at <http://www.annals.org/>, and Epidemiology at <http://www.epidem.com/>). Information on the STROBE Initiative is available at [www.strobe-statement.org](http://www.strobe-statement.org).

# BMJ Open

## Cross-sectional association between prolactin levels and nonalcoholic fatty liver disease in patients with type 2 diabetes mellitus: a retrospective analysis of patients from a single hospital in China

|                                 |                                                                                                                                                                 |
|---------------------------------|-----------------------------------------------------------------------------------------------------------------------------------------------------------------|
| Journal:                        | <i>BMJ Open</i>                                                                                                                                                 |
| Manuscript ID                   | bmjopen-2022-062252.R2                                                                                                                                          |
| Article Type:                   | Original research                                                                                                                                               |
| Date Submitted by the Author:   | 17-Jun-2022                                                                                                                                                     |
| Complete List of Authors:       | Yuanyuan, Zhang; Anhui University of Traditional Chinese Medicine, Liu, Huaizhen; Anhui University of Traditional Chinese Medicine, Department of Endocrinology |
| <b>Primary Subject Heading</b>: | Diabetes and endocrinology                                                                                                                                      |
| Secondary Subject Heading:      | Diabetes and endocrinology, Public health                                                                                                                       |
| Keywords:                       | DIABETES & ENDOCRINOLOGY, General diabetes < DIABETES & ENDOCRINOLOGY, General endocrinology < DIABETES & ENDOCRINOLOGY                                         |
|                                 |                                                                                                                                                                 |

SCHOLARONE™  
Manuscripts



I, the Submitting Author has the right to grant and does grant on behalf of all authors of the Work (as defined in the below author licence), an exclusive licence and/or a non-exclusive licence for contributions from authors who are: i) UK Crown employees; ii) where BMJ has agreed a CC-BY licence shall apply, and/or iii) in accordance with the terms applicable for US Federal Government officers or employees acting as part of their official duties; on a worldwide, perpetual, irrevocable, royalty-free basis to BMJ Publishing Group Ltd ("BMJ") its licensees and where the relevant Journal is co-owned by BMJ to the co-owners of the Journal, to publish the Work in this journal and any other BMJ products and to exploit all rights, as set out in our [licence](#).

The Submitting Author accepts and understands that any supply made under these terms is made by BMJ to the Submitting Author unless you are acting as an employee on behalf of your employer or a postgraduate student of an affiliated institution which is paying any applicable article publishing charge ("APC") for Open Access articles. Where the Submitting Author wishes to make the Work available on an Open Access basis (and intends to pay the relevant APC), the terms of reuse of such Open Access shall be governed by a Creative Commons licence – details of these licences and which [Creative Commons](#) licence will apply to this Work are set out in our licence referred to above.

Other than as permitted in any relevant BMJ Author's Self Archiving Policies, I confirm this Work has not been accepted for publication elsewhere, is not being considered for publication elsewhere and does not duplicate material already published. I confirm all authors consent to publication of this Work and authorise the granting of this licence.

1  
2  
3  
4 1 **Cross-sectional association between prolactin levels and nonalcoholic fatty liver**  
5 2 **disease in patients with type 2 diabetes mellitus: a retrospective analysis of**  
6 3 **patients from a single hospital in China**  
7  
8  
9

10 4  
11 5 Yuanyuan Zhang<sup>a</sup>, Huaizhen Liu<sup>a\*</sup>

12 6 <sup>a</sup>Department of Endocrinology, Geriatrics Center, The First Affiliated Hospital of Anhui  
13 7 University of Traditional Chinese Medicine, 117 Meishan Road, Hefei, Anhui, 230009, China

14 8 **\*Correspondence to:** Huaizhen Liu, The First Affiliated Hospital of Anhui University of  
15 9 Traditional Chinese Medicine.

16 10 E-mail: [inkslab@163.com](mailto:inkslab@163.com)

17 11 TEL:055162850152  
18  
19  
20  
21  
22

23 12  
24 13 **Abstract**

25 14 **Objective:** This study aimed to retrospectively assess the association between  
26 15 prolactin (PRL) and nonalcoholic fatty liver disease (NAFLD) in patients with type 2  
27 16 diabetes mellitus (T2DM).  
28  
29

30 17 **Design and setting:** A retrospective, cross-sectional study was conducted at a single  
31 18 hospital in Anhui, China.

32 19 **Participants:** A total of 406 patients with T2DM (230 men and 176 women) were  
33 20 included.  
34

35 21 **Outcome measures:** P values for the independent T test, the Mann-Whitney rank  
36 22 sum test, the Spearman correlation analysis, and multiple logistic regression models  
37 23 were used to explore the association between PRL and NAFLD in patients with  
38 24 T2DM.  
39

40 25 **Results:** The results indicated that in both men and women, the levels of PRL were  
41 26 significantly lower in the T2DM with NAFLD group than in the T2DM without  
42 27 NAFLD group (men: 9.56 ng/mL vs. 10.36 ng/mL, women: 10.38 ng/mL vs. 12.97  
43 28 ng/mL). In male patients, the levels of PRL were negatively correlated with hip  
44 29 circumference ( $r=-0.141$ ,  $p=0.032$ ), homeostasis model assessment for insulin  
45 30 resistance (C-peptide) ( $r=-0.141$ ,  $p=0.032$ ) and triglyceride (TG) ( $r=-0.252$ ,  $p=0.000$ )  
46 31 values and inversely correlated with high-density lipoprotein (HDL) ( $r=0.147$ ,  
47  
48  
49  
50  
51  
52  
53  
54  
55  
56  
57  
58  
59  
60

1  
2  
3  
4 32 p=0.025) levels. In female patients, PRL levels were negatively related to body mass  
5  
6 33 index ( $r=-0.192$ ,  $p=0.011$ ), diastolic blood pressure ( $r=-0.220$ ,  $p=0.003$ ), waist  
7  
8 34 circumference ( $r=-0.152$ ,  $p=0.044$ ), hip circumference ( $r=-0.157$ ,  $p=0.037$ ) and TG  
9  
10 35 ( $r=-0.258$ ,  $p=0.001$ ) values. Logistic regression analysis revealed a negative  
11  
12 36 relationship between PRL and NAFLD (men: OR 0.891, 95% CI 0.803-0.989,  
13  
14 37  $p=0.031$ ; women: OR 0.874, 0.797-0.957,  $p=0.004$ ). As PRL levels increased,  
15  
16 38 NAFLD prevalence decreased in both sexes (men:  $p=0.012$ , women:  $p=0.013$ ).

17  
18 39 **Conclusion:** Our results suggest that low levels of PRL in the physiological range  
19  
20 40 were markers of NAFLD in patients with T2DM and that PRL within the biologically  
21  
22 41 high range may play a protective role in the pathogenesis of NAFLD.

23  
24  
25 42  
26 43 **Keywords:** Type 2 diabetes mellitus; Nonalcoholic fatty liver disease; Prolactin.

#### 27 28 29 44 30 45 **Strengths and limitations of this study**

31 46 ▶ Abdominal colour ultrasonography, as used in the study, is a common and simple  
32  
33 47 method for the clinical diagnosis of nonalcoholic fatty liver disease (NAFLD).

34  
35 48 ▶ The normal range of serum prolactin (PRL) levels differs by sex, so we conducted a  
36  
37 49 sex-stratified analysis of patients with type 2 diabetes mellitus (T2DM).

38  
39 50 ▶ P values for independent T tests and multiple logistic regression models were used  
40  
41 51 to assess the association between PRL and NAFLD in patients with T2DM.

42  
43 52 ▶ This was a cross-sectional study that cannot provide evidence of causal  
44  
45 53 relationships.

#### 46 47 48 49 54 50 55 **Introduction**

51 56 The liver is an important organ for glycolipid metabolism in the body. When  
52  
53 57 triglyceride deposition in hepatocytes increases and exceeds 5%, and other factors  
54  
55 58 causing liver steatosis (such as alcohol consumption and viral hepatitis) are excluded,  
56  
57 59 NAFLD can be diagnosed[1]. In China, with the gradual improvement of living  
58  
59 60 standards, NAFLD has surpassed chronic viral hepatitis to become the primary cause  
60  
61 61 of chronic liver diseases[2]. Currently, the global incidence of NAFLD is 25.2%[3],

1  
2  
3  
4 62 while the prevalence of NAFLD diagnosed by ultrasound in patients with T2DM is  
5  
6 63 73.7%[4]. T2DM is an important factor associated with the progression of NAFLD to  
7  
8 64 NASH and fibrosis[1].

9  
10 65 NAFLD is closely related to central obesity, hypertension, hyperlipidaemia,  
11  
12 66 T2DM and metabolic syndrome (MetS)[5]. Among MetS-related diseases, only  
13  
14 67 NAFLD is considered a strong predictor of MetS, and the incidence of MetS in fatty  
15  
16 68 liver patients is more than 4 times that in nonfatty liver patients[6]. Therefore,  
17  
18 69 NAFLD is considered the expression of MetS in the liver.

19  
20 70 Prolactin (PRL) is a type of hormone that is mainly secreted by the  
21  
22 71 adenohypophysis. Its main physiological function is to stimulate breast development  
23  
24 72 and milk secretion[7]. Its receptors are widely distributed in various tissues and  
25  
26 73 organs of the body, including in fat, the liver, and the pancreas [8]. PRL can increase  
27  
28 74 the proliferation of  $\beta$  cells, stimulate insulin secretion and participate in the regulation  
29  
30 75 of glucose metabolism [9]. PRL can also inhibit lipolysis and activate adipocyte  
31  
32 76 differentiation by activating peroxisome proliferator-activated receptor  $\gamma$ [10]. Studies  
33  
34 77 in China and abroad have found that a decrease in serum PRL at the physiological  
35  
36 78 level is closely related to the occurrence of T2DM. Wang et al.[11] discovered that  
37  
38 79 the PRL levels of patients with T2DM and impaired glucose regulation were  
39  
40 80 significantly lower than those of people with normal glucose metabolism. The  
41  
42 81 researchers further pointed out that a decrease in physiological levels of PRL was  
43  
44 82 related to an increased risk of T2DM[9]. Manshaei et al.[12] also found that the serum  
45  
46 83 PRL concentration of patients with T2DM was lower than that of healthy people.  
47  
48 84 Because of the high incidence of NAFLD in patients with T2DM, T2DM is also an  
49  
50 85 important factor in MetS. The relationship among PRL, NAFLD and MetS at the  
51  
52 86 physiological level has not been explored. The goal of this research was to explore the  
53  
54 87 relationship among PRL, NAFLD and MetS in patients with T2DM.

## 54 88

### 56 89 **Methods**

#### 58 90 **Participants**

59  
60 91 All participants in this study were recruited from a hospital located in Anhui, China.



1  
2  
3  
4 92 This was a cross-sectional survey. A total of 656 patients with T2DM were  
5  
6 93 investigated in this study, but 15 participants were excluded due to the use of  
7  
8 94 medications that affect PRL levels (metoclopramide, methyldopa, opiates, and  
9  
10 95 cimetidine). Thirty participants were excluded because their levels of  
11  
12 96 thyroid-stimulating hormone, cortisol, oestradiol and testosterone were higher than  
13  
14 97 the normal range. Four participants had pituitary diseases, five had hyperglycaemia,  
15  
16 98 56 exhibited excessive alcohol consumption (intake of alcohol exceeding 140 g/week  
17  
18 99 for men and 70 g/week for women), 11 had cancer, 5 were pregnant, 7 had type 1  
19  
20 100 diabetes, 25 had acute complications of diabetes, 15 had acute cardiovascular events,  
21  
22 101 30 had severe hepatic and renal insufficiency, 8 had viral liver disease, 30 had  
23  
24 102 alcoholic liver disease, 5 had drug-induced liver disease and 4 had autoimmune liver  
25  
26 103 disease. Ultimately, 406 participants (230 men and 176 women) were included in this  
27  
28 104 study. This study was a retrospective study, so it was exempted from the requirement  
29  
30 105 of informed consent and was approved by the Ethics Committee of The First  
31  
32 106 Affiliated Hospital of Anhui University of Traditional Chinese Medicine.

### 33 107 **Data collection**

34  
35 108 We collected data on sex, age, menopausal history of women, height, weight, diabetes  
36  
37 109 course, preadmission hypoglycaemic plan (including metformin, insulin and other  
38  
39 110 hypoglycaemic drugs such as sulfonylureas, glinides, thiazolidinediones,  
40  
41 111  $\alpha$ -glucosidase inhibitors, glucagon-like peptide-1 receptor agonists, dipeptidyl  
42  
43 112 peptidase 4 inhibitors, and sodium-glucose cotransporter protein 2 inhibitors), history  
44  
45 113 of alcohol consumption, occurrence of cancer, history of other liver diseases, waist  
46  
47 114 circumference, hip circumference, and blood pressure. Venous blood samples were  
48  
49 115 collected in the morning on the second day after admission, and all blood was  
50  
51 116 extracted with a centrifuge. After the separation of serum, fasting blood glucose  
52  
53 117 (FBG), blood fat, liver and kidney function were measured using an automatic  
54  
55 118 biochemical analyser (7600-020; Hitachi). Fasting C-peptide (FCP) levels were  
56  
57 119 examined using an enzyme-linked immunosorbent assay (A2000 Plus; Autolumo). An  
58  
59 120 automated chemiluminescent immunoassay (Siemens Immulite 2000, UK) was used  
60

1  
2  
3  
4 121 to measure PRL levels. The coefficients of intra-assay and interassay variation ranged  
5 122 from 2.49-3.47% and 2.91-3.14%, respectively. PRL levels are affected by many  
6  
7 123 conditions, including the use of various drugs, stress, and exercise, so we took blood  
8  
9 124 samples at 9:00 am on the first day after the patients were admitted to the hospital and  
10  
11 125 the next morning. We took 2 ml blood samples each time. The patients fasted and  
12  
13 126 rested in a sitting position for 30 minutes, and then the average value of two blood  
14  
15 127 pressure readings was taken. High-performance liquid chromatography was used to  
16  
17 128 check glycosylated haemoglobin (HbA1c) (Variant II; Bio-Rad).

### 19 129 **Definitions, counts and groups**

21 130 The diagnosis of T2DM was based on the diagnostic criteria proposed by the World  
22  
23 131 Health Organization (WHO) Diabetes Expert Committee in 1999. The physiological  
24  
25 132 level of PRL was based on the normal reference range of our hospital, which is  
26  
27 133 2.78-29.20 ng/mL for premenopausal women, 1.79-20.28 ng/mL for menopausal  
28  
29 134 women and 2.12-17.69 ng/mL for men.

31 135 NAFLD was diagnosed by ultrasound[13] by a senior technician. The ultrasonic  
32  
33 136 diagnosis of fatty liver is as follows: the near-field of the liver permeates a punctiform  
34  
35 137 hyperecho, the composition of the intrahepatic duct is not clearly demonstrated by  
36  
37 138 ultrasonography, and a weak echo is present in the distal echo. The diagnosis of  
38  
39 139 NAFLD is based on the following requirements: no history of alcohol consumption,  
40  
41 140 no other types of liver diseases, and an unexplained increase in serum alanine  
42  
43 141 aminotransferase (ALT), aspartic acid aminotransferase (AST) or glutamyltransferase  
44  
45 142 (GGT) levels over 6 months[14].

46  
47 143 The diagnosis of MetS conformed to the standard put forward in the ninth edition  
48  
49 144 of internal medicine in China [15], and the diagnostic standard included three or more  
50  
51 145 of the following items: ① central obesity and/or abdominal obesity: a waist  
52  
53 146 circumference greater than 90 cm for men and 85 cm for women; ② hyperglycaemia:  
54  
55 147 an FBG level > 6.1 mmol/L or a 2-hour blood glucose level >7.8 mmol/L and/or the  
56  
57 148 confirmation of a diabetes diagnosis and treatment with hypoglycaemic therapy; ③  
58  
59 149 hypertension: a blood pressure exceeding 130/85 mmHg and/or a diagnosis of  
60  
150 hypertension and treatment with antihypertensive therapy; ④ a fasting triglyceride

1  
2  
3  
4 151 (TG) level exceeding 1.7 mmol/l; and ⑤ a fasting high-density lipoprotein (HDL)  
5  
6 152 level below 1.04 mmol/l. Body mass index (BMI) was computed by dividing the body  
7  
8 153 weight (kg) by the square of the height (m<sup>2</sup>). The homeostasis model assessment of  
9  
10 154 insulin resistance (C-peptide) (HOMA-IR (CP)) value was determined by the FCP  
11  
12 155 level as a substitute for the fasting insulin level as follows: HOMA-IR (CP)  
13  
14 156 =1.5+FBG (mmol/L)xFCP (pmol/L)/2800. HOMA-β (CP-DM) =0.27x FCP (pmol/L)  
15  
16 157 (FBG (mmol/L) -3.5)[16].

17  
18 158 In conformity with ultrasonic diagnosis, patients with T2DM who met the  
19  
20 159 inclusion criteria were divided into the without NAFLD group (77 men, 66 women)  
21  
22 160 and the with NAFLD group (153 men, 110 women).

### 23 161 **Statistical analysis**

24  
25 162 SPSS 21.0 statistical software was used for the data analysis, and the Kolmogorov–  
26  
27 163 Smirnov normality test was performed for all data. The measured data with a normal  
28  
29 164 distribution are represented as the mean and standard deviation (SD). Comparisons  
30  
31 165 were conducted between two groups, and comparisons were performed using  
32  
33 166 independent T tests. Measurement data with nonnormal distributions are expressed as  
34  
35 167 medians (interquartile intervals). In this situation, two groups were compared by using  
36  
37 168 the Mann–Whitney rank sum test. Categorical variables are shown as the number of  
38  
39 169 cases, and the chi-square test was adopted to demonstrate the differences within two  
40  
41 170 or more groups. Spearman correlation analysis compared the relationship between  
42  
43 171 PRL levels and the other variables. The relationships among PRL, NAFLD and MetS  
44  
45 172 were analysed by logistic regression. P<0.05 or P<0.01 represented obvious  
46  
47 173 significant differences.

### 48 174 **Patient and public involvement**

49  
50 175 Neither the patients nor the public were not involved in the design, conduction,  
51  
52 176 reporting, or dissemination plans of our research.

### 53 177 54 55 178 **Results**

#### 56 179 **Comparison of general findings and laboratory test targets in each group**

57  
58  
59 180 The ultrasonic diagnostic rate of NAFLD was 263 patients (153 plus 110 patients)  
60

181 (64.8%) (Table 1). Men with NAFLD were younger, had higher BMI, waist  
 182 circumference, hip circumference, diastolic blood pressure (DBP), GGT, FBG, TG,  
 183 total cholesterol (TC), low-density lipoprotein (LDL), HOMA-IR (CP), and HbA1C  
 184 values, and had a higher MetS incidence. Women with NAFLD also had higher BMI,  
 185 ALT, GGT, TG, HOMA-IR (CP), and HbA1C values and a higher MetS incidence.  
 186 HDL and PRL levels were markedly reduced in the patients with NAFLD compared  
 187 with those without NAFLD in both sexes ( $p < 0.05$  or  $p < 0.01$ ). In terms of medication  
 188 history, there was no significant difference between the two groups of male and  
 189 female patients in hypoglycaemic programmes, which could exclude the influence of  
 190 hypoglycaemic drugs on the study.

191  
 192 **Table 1. Comparison of the general characteristics and biochemical indices of**  
 193 **each group**

|                           | Men                |                    |         | Women              |                    |         |
|---------------------------|--------------------|--------------------|---------|--------------------|--------------------|---------|
|                           | T2DM without NAFLD | T2DM with NAFLD    | P value | T2DM without NAFLD | T2DM with NAFLD    | P value |
| N                         | 77                 | 153                |         | 66                 | 110                |         |
| Age (years)               | 63(54-63)          | 54(48-62)          | 0.000   | 65(57-71)          | 61(55-69)          | 0.077   |
| Metabolic syndrome (%)    | 64.9               | 85.6               | 0.000   | 59.100             | 80.000             | 0.003   |
| Menopause (%)             | NA                 | NA                 |         | 99.100             | 83.600             | 0.117   |
| Diabetes course(years)    | 10(3-15)           | 8(3-12)            | 0.280   | 10(5-20)           | 10(4-15)           | 0.070   |
| BMI (kg/m <sup>2</sup> )  | 24.90±2.97         | 27.18±2.94         | 0.000   | 24.54±3.35         | 26.33±3.55         | 0.000   |
| Systolic pressure (mmHg)  | 130(125-146)       | 132(121-145)       | 0.880   | 130(124-151)       | 130(123-144)       | 0.233   |
| Diastolic pressure (mmHg) | 81.48±9.59         | 85.80±9.94         | 0.002   | 80.48±8.59         | 79.07±8.16         | 0.277   |
| Waist circumference (cm)  | 90.71±8.02         | 96.29±8.45         | 0.000   | 89.02±9.07         | 91.38±9.41         | 0.103   |
| Hip circumference (cm)    | 96.64±6.77         | 100.66±6.18        | 0.000   | 97.00±6.52         | 97.73±7.81         | 0.526   |
| ALT (U/L)                 | 19(13-28)          | 21(15-32)          | 0.082   | 15(12-21)          | 19(14-33)          | 0.000   |
| AST (U/L)                 | 18(15-23)          | 19(15-23)          | 0.881   | 17(15-20)          | 18(15-25)          | 0.094   |
| GGT (U/L)                 | 24(17-36)          | 35(23-56)          | 0.000   | 19(14-28)          | 25(19-35)          | 0.000   |
| FBG (mmol/L)              | 6.81(5.41-9.49)    | 7.80(6.21-11.0)    | 0.002   | 6.61(5.48-9.34)    | 7.89(6.05-10.96)   | 0.050   |
| TG (mmol/L)               | 1.20(0.79-1.75)    | 2.01(1.42-3.27)    | 0.000   | 1.23(0.93-1.50)    | 1.81(1.19-2.35)    | 0.000   |
| TC (mmol/L)               | 4.32±0.92          | 4.83±1.10          | 0.001   | 4.77±1.24          | 5.02±1.11          | 0.158   |
| HDL (mmol/L)              | 1.04(0.96-1.18)    | 0.97(0.82-1.11)    | 0.004   | 1.23(1.05-1.47)    | 1.10(0.99-1.28)    | 0.002   |
| LDL (mmol/L)              | 2.45±0.78          | 2.78±0.85          | 0.004   | 2.84±1.05          | 2.98±0.88          | 0.373   |
| HOMA-IR (CP)              | 2.90(2.46-3.97)    | 3.99(3.18-5.20)    | 0.000   | 2.97(2.54-3.68)    | 3.68(2.91-4.41)    | 0.001   |
| HOMA-β (CP-DM)            | 46.94(25.29-88.92) | 44.33(27.17-83.92) | 0.686   | 38.55(22.52-80.19) | 48.27(25.02-73.90) | 0.553   |
| HbA1C (%)                 | 7.5(6.7-9.1)       | 8.3(7.0-9.7)       | 0.043   | 7.7(6.7-9.3)       | 8.5(7.4-9.9)       | 0.020   |

|                           |                   |                  |       |                    |                   |       |
|---------------------------|-------------------|------------------|-------|--------------------|-------------------|-------|
| PRL (ng/mL)               | 10.36(9.35-14.72) | 9.56(7.81-12.60) | 0.001 | 12.97(10.03-16.58) | 10.38(8.43-14.27) | 0.001 |
| Hypoglycaemic plan        |                   |                  |       |                    |                   |       |
| Metformin                 | 26(33.8%)         | 62(40.5%)        |       | 17(25.8%)          | 43(39.1%)         |       |
| Other hypoglycaemic drugs | 16(20.8%)         | 44(28.8%)        | 0.083 | 23(34.8%)          | 27(24.5%)         | 0.150 |
| Insulin                   | 35(45.4%)         | 47(30.7%)        |       | 26(39.4%)          | 40(36.4%)         |       |

194 Note: NAFLD, nonalcoholic fatty liver disease; T2DM, type 2 diabetes mellitus; BMI, body mass index; ALT, alanine aminotransferase; AST, aspartic acid  
 195 aminotransferase; GGT, glutamyltransferase; FBG, fasting blood glucose; TG, triglyceride; TC, total cholesterol; HDL, high-density lipoprotein; LDL,  
 196 low-density lipoprotein; HOMA-IR (CP), homeostasis model assessment for insulin resistance (C-peptide); HOMA-β (CP-DM): homeostasis model assessment  
 197 for beta (C-peptide-diabetes mellitus); HbA1c, glycosylated haemoglobin; PRL, prolactin. The measured data with a normal distribution are represented as the  
 198 mean±SD. Measurement data for nonnormal distributions are expressed as medians (interquartile intervals). Normally distributed variables: BMI, diastolic  
 199 blood pressure, waist circumference, hip circumference, TC, LDL; Nonnormally distributed variables: Age, diabetes course, systolic blood pressure, ALT, AST,  
 200 GGT, FBG, TG, HDL, HOMA-IR (CP), HOMA-β (CP-DM), HbA1C, and PRL

201

202 Because women's serum PRL levels are affected by menopause, we analysed the  
 203 metabolic status and PRL levels of female patients with or without NAFLD before  
 204 and after menopause (Table 2). Premenopausal women with NAFLD had higher BMI,  
 205 FBG, TG, and HbA1C values and a higher MetS incidence. Postmenopausal women  
 206 with NAFLD had higher BMI, ALT, GGT, TG, and HOMA-IR (CP) values and a  
 207 higher MetS incidence, while HDL and PRL values were markedly reduced in the  
 208 patients with NAFLD compared with those in patients without NAFLD (p<0.05 or  
 209 p<0.01).

210

211 **Table 2. Comparison of the clinical data of women with and without NAFLD**  
 212 **before and after menopause**

|                           | Premenopause          |                    |            | Postmenopause         |                    |            |
|---------------------------|-----------------------|--------------------|------------|-----------------------|--------------------|------------|
|                           | T2DM without<br>NAFLD | T2DM with<br>NAFLD | P<br>value | T2DM without<br>NAFLD | T2DM with<br>NAFLD | P<br>value |
| N                         | 6                     | 18                 |            | 60                    | 92                 |            |
| Age (years)               | 44.80±3.76            | 45.20±4.37         | 0.848      | 66.15±8.34            | 64.61±8.16         | 0.261      |
| Metabolic syndrome (%)    | 0                     | 77.8               | 0.001      | 65                    | 80.4               | 0.033      |
| Diabetes course (years)   | 8.180±6.69            | 4.78±4.12          | 0.149      | 12.86±9.02            | 10.69±6.88         | 0.116      |
| BMI (kg/m <sup>2</sup> )  | 22.80±3.87            | 26.70±3.43         | 0.029      | 24.71±3.28            | 26.26±3.59         | 0.008      |
| Systolic pressure (mmHg)  | 121.83±7.08           | 128.50±8.78        | 0.107      | 133(127-152)          | 131(122-145)       | 0.167      |
| Diastolic pressure (mmHg) | 77.50±7.18            | 84.06±6.78         | 0.055      | 80.78±8.71            | 78.10±8.08         | 0.054      |

|    |                          |                    |                    |       |                    |                    |       |
|----|--------------------------|--------------------|--------------------|-------|--------------------|--------------------|-------|
| 3  | Waist circumference (cm) | 80.33±12.36        | 89.06±7.92         | 0.055 | 89.88±8.32         | 91.84±9.65         | 0.200 |
| 4  | Hip circumference (cm)   | 94.67±6.83         | 95.61±7.65         | 0.791 | 97.23±6.50         | 98.14±7.81         | 0.456 |
| 5  | ALT (U/L)                | 13(11-16)          | 15(13-45)          | 0.121 | 15(12-22)          | 20(15-33)          | 0.000 |
| 6  | AST (U/L)                | 16(15-18)          | 16(13-35)          | 1.000 | 17(15-20)          | 19(16-25)          | 0.073 |
| 7  | GGT (U/L)                | 20.67±14.28        | 37.67±31.34        | 0.217 | 19(14-29)          | 26(18-35)          | 0.002 |
| 8  | FBG (mmol/L)             | 6.61±1.59          | 10.99±3.10         | 0.003 | 7.81±2.97          | 8.08±2.78          | 0.566 |
| 9  | TG (mmol/L)              | 1.09(0.63-1.30)    | 2.02(1.37-2.83)    | 0.003 | 1.24(0.93-1.56)    | 1.74(1.17-2.34)    | 0.000 |
| 10 | TC (mmol/L)              | 4.77±0.84          | 5.16±1.46          | 0.534 | 4.77±1.28          | 4.99±1.04          | 0.229 |
| 11 | HDL (mmol/L)             | 1.23±0.17          | 1.06±0.21          | 0.086 | 1.27±0.29          | 1.14±0.27          | 0.005 |
| 12 | LDL (mmol/L)             | 2.92±0.83          | 2.84±0.86          | 0.838 | 2.84±1.08          | 3.00±0.89          | 0.301 |
| 13 | HOMA-IR (CP)             | 2.30±0.57          | 4.87±2.98          | 0.051 | 3.28±1.00          | 3.73±1.43          | 0.036 |
| 14 | HOMA-β (CP-DM)           | 25.07(19.86-28.67) | 25.99(13.78-56.47) | 0.689 | 47.00(22.63-85.05) | 51.60(28.83-75.27) | 0.505 |
| 15 | HbA1C (%)                | 7.62±0.89          | 9.53±1.66          | 0.014 | 8.16±1.82          | 8.53±1.67          | 0.196 |
| 16 | PRL (ng/mL)              | 18.92±8.57         | 14.54±4.64         | 0.122 | 13.16±3.79         | 10.88±3.77         | 0.000 |

213 Note: NAFLD, nonalcoholic fatty liver disease; T2DM, type 2 diabetes mellitus; BMI, body mass index; ALT, alanine aminotransferase; AST, aspartic acid  
 214 aminotransferase; GGT, glutamyltransferase; FBG, fasting blood glucose; TG, triglyceride; TC, total cholesterol; HDL, high-density lipoprotein; LDL,  
 215 low-density lipoprotein; HOMA-IR (CP), homeostasis model assessment for insulin resistance (C-peptide); HOMA-β (CP-DM): homeostasis model assessment  
 216 for beta (C-peptide-diabetes mellitus); HbA1c, glycosylated haemoglobin; PRL, prolactin. The measurement data with a normal distribution are represented as  
 217 the mean±SD. Measurement data with nonnormal distributions are expressed as medians (interquartile intervals).<sup>1</sup>

### 219 Relationship between PRL levels and MetS-related parameters

220 We further investigated the relationship between PRL levels and MetS-related  
 221 parameters (Table 3). We found that in male subjects, the levels of PRL were  
 222 negatively correlated with hip circumference, TG and HOMA-IR (CP) values and  
 223 positively associated with HDL levels. In female subjects, PRL levels were negatively  
 224 correlated with BMI, DBP, and waist circumference values.

226 **Table 3. Relationship between PRL levels and MetS-related parameters**

|                     | Men    |         | Women  |         |
|---------------------|--------|---------|--------|---------|
|                     | r      | P value | r      | P value |
| BMI                 | -0.092 | 0.166   | -0.192 | 0.011   |
| Systolic pressure   | 0.046  | 0.492   | -0.045 | 0.552   |
| Diastolic pressure  | -0.125 | 0.059   | -0.220 | 0.003   |
| Waist circumference | -0.056 | 0.398   | -0.152 | 0.044   |
| Hip circumference   | -0.141 | 0.032   | -0.157 | 0.037   |
| FBG                 | -0.109 | 0.098   | -0.034 | 0.654   |

|                       |        |       |        |       |
|-----------------------|--------|-------|--------|-------|
| TG                    | -0.252 | 0.000 | -0.258 | 0.001 |
| TC                    | -0.096 | 0.146 | -0.061 | 0.421 |
| HDL                   | 0.147  | 0.025 | 0.065  | 0.390 |
| LDL                   | -0.042 | 0.528 | -0.110 | 0.146 |
| HOMA-IR(CP)           | -0.141 | 0.032 | -0.049 | 0.519 |
| HOMA- $\beta$ (CP-DM) | 0.019  | 0.772 | -0.044 | 0.562 |
| HbA1C                 | -0.091 | 0.168 | 0.057  | 0.450 |

Note: Met S, metabolic syndrome; BMI, body mass index; FBG, fasting blood glucose; TG, triglyceride; TC, total cholesterol; HDL, high-density lipoprotein; LDL, low-density lipoprotein; HOMA-IR (CP), homeostasis model assessment for insulin resistance (C-peptide); HOMA- $\beta$  (CP-DM): homeostasis model assessment for beta (C-peptide-diabetes mellitus); HbA1c, glycosylated haemoglobin; PRL, prolactin..

### Multiple-factor logistic regression analysis of serum PRL levels and NAFLD risk

The impact index for NAFLD was assessed using multiple logistic regression analysis, which included age, BMI, menopause, TG, LDL, HOMA-IR (CP), HbA1C and PRL as variables. We found that PRL levels were independently negatively associated with NAFLD in both men and women (odds ratio (OR): 0.891, 95% confidence interval (CI): 0.803-0.989,  $p=0.031$ , for men; OR: 0.874, 95% (CI): 0.797-0.957,  $p=0.004$ , for women). Other risk factors included age, BMI, LDL and HOMA-IR (CP) for men and TG for women (Table 4).

**Table 4 Multivariate logistic regression analysis of serum PRL levels and NAFLD risk**

|             | Men     |                    |         | Women   |                    |         |
|-------------|---------|--------------------|---------|---------|--------------------|---------|
|             | $\beta$ | OR(95% CI)         | p value | $\beta$ | OR(95% CI)         | p value |
| Age         | -0.045  | 0.956(0.924-0.989) | 0.010   | -0.044  | 0.957(0.912-1.004) | 0.070   |
| BMI         | 0.255   | 1.291(1.122-1.484) | 0.000   | 0.090   | 1.094(0.97-1.224)  | 0.120   |
| Menopause   |         |                    |         | 0.213   | 1.237(0.281-5.441) | 0.778   |
| TG          | 0.176   | 1.193(0.959-1.483) | 0.113   | 0.981   | 2.666(1.404-5.064) | 0.003   |
| LDL         | 0.493   | 1.637(1.046-2.561) | 0.031   | -0.121  | 0.886(0.596-1.318) | 0.550   |
| HOMA-IR(CP) | 0.360   | 1.134(1.062-1.936) | 0.019   | 0.215   | 1.240(0.859-1.788) | 0.250   |
| HbA1C       | 0.057   | 1.059(0.872-1.287) | 0.564   | 0.047   | 1.048(0.840-1.308) | 0.676   |
| PRL         | -0.115  | 0.891(0.803-0.989) | 0.031   | -0.135  | 0.874(0.797-0.957) | 0.004   |

Note: The risk factors for NAFLD were assessed using multiple logistic regression analysis in men and women. The ORs with corresponding 95% CIs were adjusted for age, BMI, menopause, TG, LDL and HOMA-IR (CP), HbA1C and PRL levels as variables. NAFLD, nonalcoholic fatty liver disease; BMI, body mass index; FBG, fasting blood glucose; TG, triglyceride; LDL, low-density lipoprotein; HOMA-IR (CP), homeostasis model assessment for insulin resistance (C-peptide); HbA1c, glycosylated haemoglobin; PRL, prolactin.; PRL, prolactin. OR: Odds ratio; CI: Confidence interval



246

### 247 **Relationship between PRL levels and the prevalence of NAFLD and MetS**

248 According to the quartiles of PRL levels, the subjects were divided into four groups:  
249 T1<8.29 (n= 57 patients), 8.29≤T2<9.93 (n= 58 patients), 9.93≤T3<12.68 (n= 57  
250 patients), and T4≥12.68 (n= 58 patients) ng/mL for men (n= 230 patients) and  
251 T1<8.95 (n= 44 patients), 8.95≤T2<11.32 (n= 44 patients), 11.32≤T3<14.95 (n= 44  
252 patients), and T4≥14.95 (n= 44 patients) ng/mL for women (n= 176 patients). The  
253 chi-square test was used to compare the prevalence and composition ratio among  
254 different groups. The prevalence of NAFLD exhibited a decreasing trend with the rise  
255 in the PRL quartile in both sexes (T1: 84.2%, T2: 63.8%, T3: 59.6%, T4: 58.6%,  
256 p=0.012 in men; T1: 79.5%, T2: 65.9%, T3: 54.5%, T4: 50%, p= 0.013 in women).  
257 However, the prevalence rates of MetS were T1: 86%, T2: 79.3%, T3: 77.2%, and T4:  
258 72.4% (p= 0.354) in men and T1: 84.1%, T2: 70.5%, T3: 77.3%, and T4: 56.8% (p=  
259 0.031) in women. Therefore, in female subjects, the prevalence rate of MetS in the  
260 fourth quartile of PRL levels was significantly lower than those in the first, second  
261 and third quartiles.

262

### 263 **Discussion**

264 At present, due to the rapid increase in the incidence of obesity and obesity-  
265 related diseases, NAFLD has become an important public health problem[17].  
266 NAFLD is considered the manifestation of MetS in the liver, especially in patients  
267 with T2DM[18]. In this study, it was found that the incidence of NAFLD diagnosed  
268 by abdominal liver colour Doppler ultrasound was 64.8%. Compared with non  
269 NAFLD patients, NAFLD patients had higher BMI, TG, GGT, HOMA-IR (CP), and  
270 HbA1C values, a higher MetS incidence and lower HDL levels in both sexes. Zhang  
271 et al.[19] obtained similar results. BMI, TG and HDL are components of MetS.  
272 Therefore, T2DM complicated with NAFLD promotes abnormalities in metabolic  
273 indices.

274 PRL is a hormone that is closely related to metabolism[20]. Recent findings have  
275 shown that there is a close association between PRL levels and T2DM. A

1  
2  
3  
4 276 cross-sectional study included 2377 adults from the community population (excluding  
5  
6 277 those with hyperprolactinemia) and found that individuals with impaired glucose  
7  
8 278 regulation and T2DM had lower PRL levels. Researchers controlled for age, sex, BMI  
9  
10 279 and other confounding factors and still discovered that the risk in the abovementioned  
11  
12 280 people with high serum PRL levels was significantly reduced [11]. A further  
13  
14 281 follow-up of 3.7 years revealed that female patients in the highest quartile of PRL  
15  
16 282 levels had a lower risk of T2DM, with a risk ratio of 0.48[9]. Another cross-sectional  
17  
18 283 study also found that the risk of MetS and T2DM in women with lower baseline PRL  
19  
20 284 levels was increased[21]. A large meta-analysis indicated that higher serum PRL  
21  
22 285 levels in the normal range were related to a low risk of T2DM[22]. Jha et al.[23] also  
23  
24 286 found that serum PRL levels had a significant correlation with liver disease and  
25  
26 287 predicted mortality. In adipose tissue, PRL intervention can reduce the production of  
27  
28 288 malonyl coenzyme A in human primary adipocytes, thus inhibiting triglyceride  
29  
30 289 synthesis[24]. The PRL receptor can also directly inhibit the expression of fatty acid  
31  
32 290 synthetase and fatty acid synthesis in 3T3L1 cells[25]. PRL reduces the accumulation  
33  
34 291 of triglycerides in the liver through the PRL receptor, thus improving liver steatosis  
35  
36 292 [10]. These results indicate that higher PRL levels have a positive protective effect on  
37  
38 293 glucose and lipid metabolism.

39 294 Considering that PRL secretion may differ according to sex, we studied male and  
40  
41 295 female subjects separately. We found that compared with that of non-NAFLD  
42  
43 296 patients, the PRL value of NAFLD patients was lower in both sexes. Age, BMI, TG,  
44  
45 297 LDL, HOMA-IR (CP), and HbA1C were adjusted; additionally, menopausal factors  
46  
47 298 were adjusted for among female subjects, and the study suggested that PRL levels had  
48  
49 299 a negative relationship with the risk of NAFLD. In line with the quartile of PRL, the  
50  
51 300 incidence of NAFLD showed a general decrease with the increase in PRL levels in  
52  
53 301 both sexes. Zhang et al.[26] noted that when PRL increased by one standard  
54  
55 302 deviation, the risk among male NAFLD patients decreased by 12.3% and that among  
56  
57 303 female patients decreased by 21.4%. PRL was proven to be a protective factor that  
58  
59 304 affected the existence and progression of NAFLD. In another study, Zhang et al.[19]  
60  
305 also found that the PRL levels of NAFLD patients diagnosed by ultrasound were

1  
2  
3  
4 306 significantly lower than those of non-NAFLD patients, whether they were male or  
5  
6 307 female. In addition, with the increase in PRL quartile, the incidence of NAFLD  
7  
8 308 decreased. All analyses were corrected for age, sex, BMI, insulin resistance, HbA1C,  
9  
10 309 diabetes and other factors. The results showed that PRL levels had an inverse  
11  
12 310 association with NAFLD. We considered that PRL levels are affected by many  
13  
14 311 conditions, including various drugs, stress, and exercise. We excluded the following  
15  
16 312 patients: patients with the use of drugs that affect PRL levels (metoclopramide,  
17  
18 313 methyl-dopa, opiates, and cimetidine) and those with levels of thyroid-stimulating  
19  
20 314 hormone, cortisol, oestradiol and testosterone that were higher than the normal range.  
21  
22 315 In terms of medication history, there was no significant difference between the two  
23  
24 316 groups of male and female patients in regard to hypoglycaemic programmes, which  
25  
26 317 could exclude the influence of hypoglycaemic drugs on the study.

27  
28 318 In addition, the secretion of PRL may be affected by menopausal status. This paper  
29  
30 319 analysed menopausal and non-menopausal women and found that postmenopausal  
31  
32 320 women with NAFLD had lower PRL levels. In addition, Zhang Zhuzi et al.[27]  
33  
34 321 divided the included women into a premenopausal group and a postmenopausal group  
35  
36 322 and found that in both groups, the PRL levels of patients with NAFLD were lower  
37  
38 323 than those of patients without NAFLD, and the decrease in PRL levels in  
39  
40 324 postmenopausal women with NAFLD was more significant. It was suggested that the  
41  
42 325 decrease in the PRL levels of patients with NAFLD was affected by menopausal  
43  
44 326 factors.

45  
46 327 Studies have shown a correlation between PRL levels and the components of  
47  
48 328 MetS, which could explain the role of PRL in NAFLD. According to basic studies, in  
49  
50 329 a mouse model with obesity induced by a high-fat diet, severe metabolic changes  
51  
52 330 would occur in mice with PRL receptor failure. The injection of PRL could improve  
53  
54 331 insulin sensitivity and prevent visceral adipocyte hypertrophy[28]. Clinical studies  
55  
56 332 have found that low serum PRL levels in the physiological range are related to poor  
57  
58 333 metabolic outcomes in MetS and T2DM patients[11]. In overweight and obese men,  
59  
60 334 serum PRL levels were lower [28]. Friedrich et al.[29] found that PRL levels were  
335 335 negatively correlated with waist circumference in 1857 healthy women aged 20-79

1  
2  
3  
4 336 years. The endocrine characteristics of MetS and polycystic ovary syndrome (PCOS)  
5 337 have a relatively high similarity rate [30]. A systematic retrospective analysis of 2052  
6  
7 338 PCOS patients revealed that the lower the serum PRL level was, the higher the BMI.  
8  
9 339 PRL levels had the opposite relationship with TG, TC and LDL-C levels [31]. Arterial  
10  
11 340 hypertension is a component of MetS. A prospective study of 874 postmenopausal  
12  
13 341 women found that PRL levels increased by 1 standard deviation during 8 years of  
14  
15 342 follow-up, and the relative risk of hypertension was 1.31[32]. Our study found that in  
16  
17 343 male subjects, the levels of PRL were negatively correlated with hip circumference,  
18  
19 344 TG and HOMA-IR (CP) values and positively associated with HDL levels. In female  
20  
21 345 subjects, PRL levels were negatively correlated with BMI, DBP, waist circumference,  
22  
23 346 hip circumference, and TG values. In female subjects, the prevalence rates of MetS in  
24  
25 347 the fourth quartile of PRL levels were significantly lower than those in the first,  
26  
27 348 second and third quartiles. Furthermore, premenopausal and postmenopausal women  
28  
29 349 with NAFLD had higher BMI and TG levels and a higher MetS incidence. NAFLD is  
30  
31 350 very common in obese and dyslipidaemic patients. Obese individuals produce  
32  
33 351 relatively excessive proinflammatory factors, some of which inhibit the treatment of  
34  
35 352 liver fat and promote the accumulation of lipids in hepatocytes [33]. Dyslipidaemia,  
36  
37 353 especially hypertriglyceridaemia, may subsequently increase the transportation of  
38  
39 354 TGs and other fats into hepatocytes, resulting in hepatic steatosis [34].

40  
41 355 As a retrospective analysis, this study has many limitations. First, the diagnosis  
42  
43 356 of NAFLD was based on ultrasound examination, which cannot distinguish NASH  
44  
45 357 from fibrosis. Second, because this was a cross-sectional study, we cannot infer the  
46  
47 358 direct cause and effect relationship between PRL levels and NAFLD and further  
48  
49 359 mechanical studies are needed to clarify the exact relationship. Third, PRL secretion  
50  
51 360 appears in pulse form, the best time to draw blood for PRL measurement is from 9:00  
52  
53 361 to 11:00 a.m., and patients should avoid emotional excitement around this time.  
54  
55 362 Finally, due to the limited number of participants in this study, the effects of drugs for  
56  
57 363 treating cardiovascular diseases and controlling blood lipids on PRL levels have not  
58  
59 364 been investigated, which requires further layered analysis in future work. Moreover,  
60  
365 the small sample size cannot replace a large-scale population-based cross-sectional

1  
2  
3  
4 366 epidemiological study, so it is necessary for future studies to increase the sample size.

5  
6 367 **Conclusions**

7 368 In summary, our research shows that serum PRL levels in the physiological range are  
8  
9 369 related to NAFLD in the T2DM population and are also connected to known  
10  
11 370 metabolic indicators. Our research results may help to predict the risk of developing  
12  
13 371 NAFLD to better understand the disease and to formulate effective prevention  
14  
15 372 strategies.  
16

17 373

18  
19 374 **Abbreviations**

20  
21 375 NAFLD: nonalcoholic fatty liver disease; T2DM: type 2 diabetes mellitus; PRL: prolactin;  
22 376 MetS: metabolic syndrome; NASH: nonalcoholic steatohepatitis; SBP: systolic blood pressure;  
23 377 DBP: diastolic blood pressure; BMI: body mass index; AST: aspartic acid aminotransferase; ALT:  
24 378 alanine aminotransferase; GGT: glutamyltransferase; FBG: fasting blood glucose; TG:  
25 379 triglyceride; TC: total cholesterol; HDL: high-density lipoprotein; LDL: low-density lipoprotein;  
26 380 HOMA-IR (CP): modified homeostasis model assessment for insulin resistance (C-peptide);  
27 381 HOMA- $\beta$  (CP-DM): homeostasis model assessment for beta (C-peptide-diabetes mellitus);  
28 382 HbA1c: glycosylated haemoglobin; SD: standard deviation; OR: odds ratio; CI: confidence  
29 383 interval.  
30  
31 384

32  
33  
34  
35 385 **Contributors**

36 386 YZ conceived the study, collected the clinical data, analysed and interpreted the data  
37  
38 387 and wrote the manuscript. HL revised the manuscript. All authors read and agreed to  
39  
40 388 the final version of the manuscript.  
41

42 389

43  
44  
45 390 **Competing interests**

46 391 The authors declare that they have no competing interests.  
47  
48

49  
50 392 **Funding**

51  
52  
53 393 This work was supported by the priority natural project of Anhui University of  
54 394 Chinese Medicine (2020yfyzc22). The funding bodies played no role in the design of  
55  
56 395 the study; the collection, analysis, and interpretation of the data; or in writing the  
57  
58 396 manuscript.  
59  
60

1  
2  
3  
4  
5  
6  
7  
8  
9  
10  
11  
12  
13  
14  
15  
16  
17  
18  
19  
20  
21  
22  
23  
24  
25  
26  
27  
28  
29  
30  
31  
32  
33  
34  
35  
36  
37  
38  
39  
40  
41  
42  
43  
44  
45  
46  
47  
48  
49  
50  
51  
52  
53  
54  
55  
56  
57  
58  
59  
60

### 397 **Data availability statement**

398 The data that support this study are available from the corresponding author upon  
399 reasonable request.

400

### 401 **Ethics approval and consent to participate**

402 This study was a retrospective study, so it was exempted from the requirement of  
403 informed consent with the approval of the Ethics Committee of The First Affiliated  
404 Hospital of Anhui University of Traditional Chinese Medicine (2020MCZQ09).

405

### 406 **References**

- 407 [1]Anstee QM, Targher G,Day CP (2013) Progression of NAFLD to diabetes  
408 mellitus,cardiovascular disease or cirrhosis.Nat Rev Gastroenterol Hepatol  
409 10:330-344.
- 410 [2]Wan FS, Fan JG, Zhang Z, Gao B, Wang HY (2014) The global burden of liver  
411 disease: the major impact of China. Hepatology 60: 2099-2108.
- 412 [3]Younossi ZM, Koenig AB, Abdelatif D, Fazel Y, Henry L, et al. (2016) Global  
413 epidemiology of nonalcoholic fatty liver disease. Meta-analytic assessment of  
414 prevalence, incidence and outcomes. Hepatology 64: 73-84.
- 415 [4]MantovaniA, TurinoT,LandoMG, Gjini K, Byrne CD, et al. (2020) Screening for  
416 non-alcoholic fatty liver disease using liver stiffness measurement and its association  
417 with chronic kidney disease and cardiovascular complications in patients with type 2  
418 diabetes. Diabetes Metab 46: 296-303.
- 419 [5]Riella ME (2015) Nonalcoholic fatty liver disease: a systematic review. Jama 313  
420 : 2263-2273.
- 421 [6]Pappachan JM,Babu S,Krishnan B,Ravindran NC (2017) Non-alcoholic Fatty  
422 Liver Disease:A Clinical Update. J Clin Transl Hepatol28: 384-393.
- 423 [7]Goffin V, Binart N, Touraine P, et al. (2002) Prolactin: the new biology of an old  
424 hormone. Annu Rev Physiol64:47-67.
- 425 [8]Yip SH, Romanò N, Gustafson P, Kelly PA (2019) Elevated prolactin during  
426 pregnancy drives a phenotypic switch in mouse hypothalamic dopaminergic



- 1  
2  
3  
4 427 neurons. *Cell Rep* 26:1787–1799.
- 5  
6 428 [9] Wang T, Xu Y, Xu M, Ning G, Lu J, et al. (2016) Circulating prolactin and risk of  
7  
8 429 type 2 diabetes: A prospective study. *Am J Epidemiol* 184:295–301.
- 9  
10 430 [10] Shao SS, Yao ZY, Lu JY, Song YF, He Z, et al. (2018) Ablation of prolactin  
11  
12 431 receptor increases hepatic triglyceride accumulation. *Biochem Biophys Res*  
13  
14 432 *Commun* 498:693–699.
- 15  
16 433 [11] Wang TG, Lu JL, Xu Y, Li M, Sun JC, et al. (2013) Circulating prolactin  
17  
18 434 associates with diabetes and impaired glucose regulation: a population-based study.  
19  
20 435 *Diabetes Care* 36: 1974–1980.
- 21  
22 436 [12] Manshaei N, Shakibaei F, Fazilati M, Salavatia H, Negahdary M, et al. (2019) An  
23  
24 437 investigation of the association between the level of prolactin in serum and type II  
25  
26 438 diabetes. *Diabetes & Metabolic Syndrome* 13: 3035–3041.
- 27  
28 439 [13] Fan JG, Farrell GC (2009) Epidemiology of non-alcoholic fatty liver disease in  
29  
30 440 China. *J Hepatol* 50: 204–210.
- 31  
32 441 [14] Fatty liver and alcoholic liver disease group of hepatology branch of Chinese  
33  
34 442 medical association, expert committee of fatty liver disease of Chinese Medical Doctor  
35  
36 443 Association (2018) Guidelines for prevention and treatment of nonalcoholic fatty liver  
37  
38 444 disease (updated in 2018). *J Practical Liver Diseases* 21:177–186.
- 39  
40 445 [15] Ge JB, Xu YJ, Wang C (2019) *Internal Medicine* (Ninth Edition). Beijing People's  
41  
42 446 Medical Publishing House 942.
- 43  
44 447 [16] Li X, Zhou ZG, Qi HY, Chen XY, Huang G (2004) Evaluation of insulin resistance  
45  
46 448 and islet  $\beta$  cell function by using fasting C peptide instead of insulin to improve Homa  
47  
48 449 formula. *J Cent South Univ* 29:419–423.
- 49  
50 450 [17] Huang H, Lee SH, Lima IS, Kim SS, Hwang WM, et al. (2018) Rho-kinase/  
51  
52 451 AMPK axis regulates hepatic lipogenesis during overnutrition. *J Clin Invest* 128:  
53  
54 452 5335–5350.
- 55  
56 453 [18] Rhee EJ (2019) Nonalcoholic fatty liver disease and diabetes: an epidemiological  
57  
58 454 perspective. *Endocrinol Metab* 34:226–233.
- 59  
60 455 [19] Zhang PZ, Ge ZJ, Wang HD, Feng WH, Sun XT, et al. (2018) Prolactin improves  
456  
457 hepatic steatosis via CD36 pathway. *J Hepatol* 68: 1247–1255.



1  
2  
3  
4  
5  
6  
7  
8  
9  
10  
11  
12  
13  
14  
15  
16  
17  
18  
19  
20  
21  
22  
23  
24  
25  
26  
27  
28  
29  
30  
31  
32  
33  
34  
35  
36  
37  
38  
39  
40  
41  
42  
43  
44  
45  
46  
47  
48  
49  
50  
51  
52  
53  
54  
55  
56  
57  
58  
59  
60

- 457 [20]Jonathan NB, Hugo ER, Brandebourg TD, Lapensee CR (2006) Focus on  
458 prolactin as metabolic hormone. *Trends Endocrinol Metab* 17: 110-116.
- 459 [21]Chirico V, Cannavo S, Lacquaniti A, Salpietro V, Mandolino M, et al. (2013)  
460 Prolactin in obese children: a bridge between inflammation and metabolic-endocrine  
461 dysfunction. *Clin Endocrinol* 79: 537-544.
- 462 [22]Faria de Castro L, Alves dos Santos A, Augusto Casulari L, Anselmi Naves L,  
463 Amorim Amato A, et al. (2020) Association between variations of physiological  
464 prolactin serum levels and the risk of type 2 diabetes: a systematic review and  
465 meta-analysis. *Diabetes Res Clin Pract* 166: 1-26.
- 466 [23]Jha SK, Kannan S (2016) Serum prolactin in patients with liver disease in  
467 comparison with healthy adults: A preliminary cross-sectional study. *Int J Appl Basic  
468 Med Res* 6: 1-3.
- 469 [24]Nilsson LA, Roepstoff C, Kiens B, Billig H, Billig H, Ling C (2009) Prolactin  
470 suppresses malonyl-CoA concentration in human adipose tissue. *HormMetab  
471 Res* 41:747-751.
- 472 [25]Hogan JC, Stephens JM (2005) The regulation of fatty acid synthase by STAT5A.  
473 *Diabetes* 54: 1968-1975.
- 474 [26]Zhang PZ, Ge ZJ, Wang HD, Feng WH, Jiang C, et al. (2018) Relationship  
475 between serum prolactin level and nonalcoholic fatty liver disease in overweight and  
476 obese patients. *Chin J Diabetes* 10: 186-192.
- 477 [27]Zhang PZ, Ge ZJ, Wang HD, Feng WH, Jiang C, et al. (2018) Relationship  
478 between serum prolactin level and nonalcoholic fatty liver disease in overweight and  
479 obese patients. *Chin J Diabetes* 10: 186-192.
- 480 [28]Ruiz-Herrera XB, de los R'ios EA, D'iaz JM, Lerma-Alvarado RM, de la Escalera  
481 LM, et al. (2017) Prolactin Promotes Adipose Tissue Fitness and Insulin Sensitivity in  
482 Obese Males. *Endocrinol* 158: 56-68.
- 483 [29]Friedrich N, Schneider HJ, Spielhagen C, Markus MR, Haring R, et al. (2011) The  
484 association of serum prolactin concentration with inflammatory biomarkers-cross  
485 -sectional findings from the population-based Study of Health in Pomerania. *Clin  
486 Endocrinol* 4:561-566.

- 1  
2  
3  
4 487 [30]Rimmer M, Tan BK, Teede H, Thangaratinam HTS, Wattar BH (2019) Metabolic  
5 488 inflexibility in women with polycystic ovary syndrome: a systematic review. *Gynecol*  
6  
7 489 *Endocrinol* 36: 501-507.
- 9 490 [31]Yang HY, Di JB, Pan JX, Yu R, Teng YL, et al. (2020) The Association Between  
11 491 Prolactin and Metabolic Parameters in PCOS Women: A Retrospective Analysis.  
12  
13 492 *Frontiers in Endocrinology* 11: 263-271.
- 15 493 [32]Zhang L, Curhan GC, Forman JP (2010) Plasma prolactin level and risk of  
16 494 incident hypertension in postmenopausal women. *J Hypertens* 7:1400–1405. [33]Choi  
17 495 S, Diehl AM (2005) Role of inflammation in nonalcoholic steatohepatitis.  
18 496 *Curr Opin Gastroenterol* 21:702–707.
- 21 497 [34]Abram CL, Lowell CA (2009) The ins and outs of leukocyte integrin signaling.  
22 498 *Annu Rev Immunol* 27:339–362.
- 23  
24  
25  
26  
27  
28  
29  
30  
31  
32  
33  
34  
35  
36  
37  
38  
39  
40  
41  
42  
43  
44  
45  
46  
47  
48  
49  
50  
51  
52  
53  
54  
55  
56  
57  
58  
59  
60

STROBE Statement—Checklist of items that should be included in reports of *cross-sectional studies*

| Section/Topic             | Item | Recommendation                                                                                                                                                                                    | Reported on page |
|---------------------------|------|---------------------------------------------------------------------------------------------------------------------------------------------------------------------------------------------------|------------------|
| Title and abstract        | 1    | (a) Indicate the study's design with a commonly used term in the title or the abstract                                                                                                            | 1, 2             |
|                           |      | (b) Provide in the abstract an informative and balanced summary of what was done and what was found                                                                                               | 2                |
| <b>Introduction</b>       |      |                                                                                                                                                                                                   |                  |
| Background/rationale      | 2    | Explain the scientific background and rationale for the investigation being reported                                                                                                              | 3                |
| Objectives                | 3    | State specific objectives, including any prespecified hypotheses                                                                                                                                  | 3                |
| <b>Methods</b>            |      |                                                                                                                                                                                                   |                  |
| Study design              | 4    | Present key elements of study design early in the paper                                                                                                                                           | 3–4              |
| Setting                   | 5    | Describe the setting, locations, and relevant dates, including periods of recruitment, exposure, follow-up, and data collection                                                                   | 4                |
| Participants              | 6    | (a) Describe the setting, locations, and relevant dates, including periods of recruitment, exposure, follow-up, and data collection                                                               | 4                |
| Variables                 | 7    | Clearly define all outcomes, exposures, predictors, potential confounders, and effect modifiers. Give diagnostic criteria, if applicable                                                          | 4–6              |
| Data sources/ measurement | 8*   | For each variable of interest, give sources of data and details of methods of assessment (measurement). Describe comparability of assessment methods if there is more than one group              | 4–5              |
| Bias                      | 9    | Describe any efforts to address potential sources of bias                                                                                                                                         | n/a              |
| Study size                | 10   | Explain how the study size was arrived at                                                                                                                                                         | 3–4              |
| Quantitative variables    | 11   | Explain how quantitative variables were handled in the analyses. If applicable, describe which groupings were chosen and why                                                                      | 6                |
| Statistical methods       | 12   | (a) Describe all statistical methods, including those used to control for confounding                                                                                                             | 6                |
|                           |      | (b) Describe any methods used to examine subgroups and interactions                                                                                                                               | 6                |
|                           |      | (c) Explain how missing data were addressed                                                                                                                                                       | n/a              |
|                           |      | (d) If applicable, describe analytical methods taking account of sampling strategy                                                                                                                | n/a              |
|                           |      | (e) Describe any sensitivity analyses                                                                                                                                                             | n/a              |
| <b>Results</b>            |      |                                                                                                                                                                                                   |                  |
| Participants              | 13*  | (a) Report numbers of individuals at each stage of study—eg numbers potentially eligible, examined for eligibility, confirmed eligible, included in the study, completing follow-up, and analysed | n/a              |
|                           |      | (b) Give reasons for non-participation at each stage                                                                                                                                              | n/a              |
|                           |      | (c) Consider use of a flow diagram                                                                                                                                                                | n/a              |

|                          |     |                                                                                                                                                                                                              |       |
|--------------------------|-----|--------------------------------------------------------------------------------------------------------------------------------------------------------------------------------------------------------------|-------|
| Descriptive data         | 14* | (a) Give characteristics of study participants (eg demographic, clinical, social) and information on exposures and potential confounders                                                                     | n/a   |
|                          |     | (b) Indicate number of participants with missing data for each variable of interest                                                                                                                          | n/a   |
| Outcome data             | 15* | Report numbers of outcome events or summary measures                                                                                                                                                         | 6–11  |
| Main results             | 16  | (a) Give unadjusted estimates and, if applicable, confounder-adjusted estimates and their precision (eg, 95% confidence interval). Make clear which confounders were adjusted for and why they were included | 6–11  |
|                          |     | (b) Report category boundaries when continuous variables were categorized                                                                                                                                    | n/a   |
|                          |     | (c) If relevant, consider translating estimates of relative risk into absolute risk for a meaningful time period                                                                                             | n/a   |
| Other analyses           | 17  | Report other analyses done—eg analyses of subgroups and interactions, and sensitivity analyses                                                                                                               | 6–11  |
| <b>Discussion</b>        |     |                                                                                                                                                                                                              |       |
| Key results              | 18  | Summarise key results with reference to study objectives                                                                                                                                                     | 11–13 |
| Limitations              | 19  | Discuss limitations of the study, taking into account sources of potential bias or imprecision. Discuss both direction and magnitude of any potential bias                                                   | 14    |
| Interpretation           | 20  | Give a cautious overall interpretation of results considering objectives, limitations, multiplicity of analyses, results from similar studies, and other relevant evidence                                   | 13–14 |
| Generalisability         | 21  | Discuss the generalisability (external validity) of the study results                                                                                                                                        | 14    |
| <b>Other information</b> |     |                                                                                                                                                                                                              |       |
| Funding                  | 22  | Give the source of funding and the role of the funders for the present study and, if applicable, for the original study on which the present article is based                                                | 15    |

\*Give information separately for exposed and unexposed groups.

**Note:** An Explanation and Elaboration article discusses each checklist item and gives methodological background and published examples of transparent reporting. The STROBE checklist is best used in conjunction with this article (freely available on the Web sites of PLoS Medicine at <http://www.plosmedicine.org/>, Annals of Internal Medicine at <http://www.annals.org/>, and Epidemiology at <http://www.epidem.com/>). Information on the STROBE Initiative is available at [www.strobe-statement.org](http://www.strobe-statement.org).
